# Supplementary material for: Application of (4R)-aminoproline in peptide engineering: conformational bias and pH-responsiveness revisited
Source: Royal Society of Chemistry journal article supplement (doi:10.1039/d2nj00305h), 2022-01-01
Supplement: d2nj00305h1.pdf [file d2nj00305h1.pdf]

## Electronic Supplementary Information

### Application of (4*R*)-aminoproline in peptide engineering: conformational bias and pH-responsiveness revisited

by V. Kubyshkin

Department of Chemistry, University of Manitoba, Winnipeg, Manitoba, Canada

#### Index

|                                                              |     |
|--------------------------------------------------------------|-----|
| Supplementary figure .....                                   | S2  |
| Description of experiments.....                              | S3  |
| General experimental information .....                       | S3  |
| Peptide synthesis.....                                       | S3  |
| Acidity measurements.....                                    | S4  |
| Circular dichroism for peptides <b>10</b> and <b>3</b> ..... | S5  |
| Dipeptide models .....                                       | S6  |
| Spectral information.....                                    | S7  |
| Ammonium transition .....                                    | S7  |
| NMR data for compounds <b>4-9</b> .....                      | S15 |
| NMR spectra of compound <b>9</b> at different pH.....        | S27 |
| NMR spectra of Fmoc-derivatives.....                         | S29 |
| Diffusion spectrum for peptide <b>10</b> .....               | S35 |
| References.....                                              | S37 |

Supplementary figure

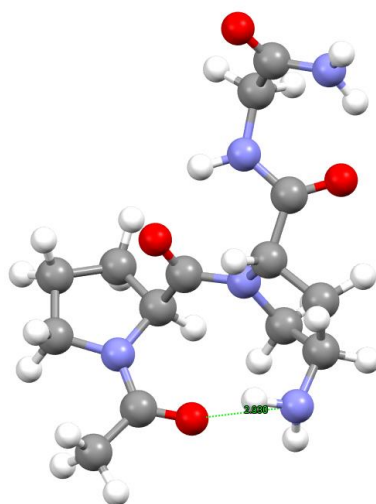

**Fig. S1** Molecular modelling of peptide Ac-Pro-Amp-Gly-NH<sub>2</sub> (**3**). The distance between the acetyl oxygen and side-chain nitrogen in Amp is 2.9 Å as highlighted in green.

The modeling was performed using Scigress Modelling Suite (Fujitsu, Poland) using the PM6 algorithm provided in the MOPAC package.

## Description of experiments

### General experimental information

pH of aqueous solutions was read-out by pre-calibrated standard glass electrodes at 295-297 K. NMR spectra were recorded on a spectrometer machine operating at 500, 471 and 126 MHz frequencies for  $^1\text{H}$ ,  $^{19}\text{F}$  and  $^{13}\text{C}$  nuclei, respectively. The temperature was set as either 298 or 310 K according to a methanol calibration sample. The spectra assignment was performed using standard 2D experiments:  $^1\text{H}\{^{13}\text{C}\}$  HSQC,  $^1\text{H}\{^{13}\text{C}\}$  HMBC,  $^1\text{H}$  NOESY (used as EXSY), and/or  $^1\text{H}$  HOHAHA (60 ms of dipsi2 sequence).

### Peptide synthesis

The peptides were prepared using conventional manual Fmoc-based peptide synthesis. Fmoc-Pro-OH, Fmoc-Gly-OH, and Fmoc-(Boc)Amp-OH were collected from commercial sources. For C-terminally free peptides, an amino acid was pre-loaded onto chlorotriyl-polystyrene resin to the loading of about  $0.45 \text{ mmol g}^{-1}$ , terminally amidated peptides were prepared on Rink amide-polystyrene resin with  $0.5 \text{ mmol g}^{-1}$  loading. *N*-Fmoc amino acids were activated by mixing with 1-[bis(dimethylamino)methylene]-1*H*-1,2,3-triazolo[4,5-*b*]pyridinium 3-oxide hexafluorophosphate (HATU) and *N,N*-diisopropylethylamine in *N,N*-dimethylformamide (DMF). The coupling was performed in DMF for 1-2 hours. Fmoc was removed by treatment with 20 w% piperidine in DMF. *N*-terminal acetylation was performed by treatment with excess acetic anhydride and *N,N*-diisopropylethylamine in DMF. Peptides were cleaved off by treatment with 30 vol% hexafluoro-2-propanol in dichloromethane for chlorotriyl resin and 95 vol% aqueous trifluoroacetic acid for Rink amide. In the former case, the Boc-group was removed by treatment with 4 M hydrogen chloride in dioxane. All peptides except **10** (see below) were freeze-dried from acetonitrile-water and used for measurements without further purification. The identity and purity of the peptides was attested by  $^1\text{H}$  NMR analysis. Peptide **10** with the sequence Ac-(Pro-Amp-Gly)<sub>6</sub>-OH was prepared by standard manual Fmoc(Boc) peptide synthesis scheme. Side chain Boc-group was removed by treatment with trifluoroacetic acid. Crude peptide **10** was purified by a standard semi-preparative reverse phase high performance liquid chromatography using a C18 column, water-acetonitrile gradient elution with 0.1 vol% trifluoroacetic acid as an ion pairing agent. Resulting peptide was a trifluoroacetate salt. Electrospray – time-of-flight spectra: Ac-Pro-Amp-Gly-NH<sub>2</sub> (peptide **3**)  $[\text{M}+\text{H}]^+$  327, Ac-(Pro-Amp-Gly)<sub>6</sub>-OH (peptide **10**)  $[\text{M}+2\text{H}]^{2+}$  830, Ac-(Pro-Hyp-Gly)<sub>6</sub>-OH  $[\text{M}+\text{H}]^+$  1664,  $[\text{M}+2\text{H}]^{2+}$  832.

### Acidity measurements

A peptide (20 mg) and potassium monohydrogen phosphate (10-15 mg) were dissolved in deionized water (15 ml). The solution was titrated by a concentrated potassium hydroxide solution to 10-15 distinct pH values, while 500  $\mu$ l aliquots were taken to NMR tubes containing 50  $\mu$ l deuterium oxide each.  $^1\text{H}$  NMR spectra were measured using W5 water suppression scheme at 700 or 500 MHz frequencies and 298 K. Additional  $^1\text{H}\{^{13}\text{C}\}$  HSQC spectra were measured to clarify the resonance assignments. Resonances undergoing transitions were analysed according to Henderson–Hasselbalch equation. The values originating from analysis of distinct resonances were averaged to deliver the final  $\text{pK}_a$  value and standard deviation. See copies of the spectra in a section below.

**Table S1** Acid-base transitions in peptides.

| Structure                                               | $\text{pK}_{a1}$ | $\text{pK}_{a2}$ | Intercharge distance, Å |
|---------------------------------------------------------|------------------|------------------|-------------------------|
| Ac-Amp-Pro-Pro-Pro-Pro-Pro-OH                           | 3.66 $\pm$ 0.04  | 7.74 $\pm$ 0.06  | 19.4                    |
| Ac-Pro-Amp-Pro-Pro-Pro-Pro-OH                           | 3.57 $\pm$ 0.08  | 7.80 $\pm$ 0.04  | 15.9                    |
| Ac-Pro-Pro-Amp-Pro-Pro-Pro-OH                           | 3.60 $\pm$ 0.03  | 7.79 $\pm$ 0.06  | 12.9                    |
| Ac-Pro-Pro-Pro-Amp-Pro-Pro-OH                           | 3.49 $\pm$ 0.04  | 7.84 $\pm$ 0.05  | 10.3                    |
| Ac-Pro-Pro-Pro-Pro-Amp-Pro-OH                           | 3.40 $\pm$ 0.03  | 7.93 $\pm$ 0.04  | 7.4                     |
| Ac-Pro-Pro-Pro-Pro-Pro-Amp-OH                           | 2.91 $\pm$ 0.04  | 8.11 $\pm$ 0.03  | 4.7                     |
| Ac-Amp-Pro-Pro-Pro-Pro-Amp-NH <sub>2</sub> ( <b>1</b> ) | -                | 7.68 $\pm$ 0.06  | 16.5                    |
| Ac-Pro-Pro-Amp-Amp-Pro-Pro-NH <sub>2</sub> ( <b>2</b> ) | -                | 7.49 $\pm$ 0.07  | 7.5                     |
| Ac-Pro-Amp-Gly-NH <sub>2</sub> ( <b>3</b> )             | -                | 7.52 $\pm$ 0.10  | -                       |

### Circular dichroism for peptides **10** and **3**

Circular dichroism measurements were performed on a standard laboratory spectropolarimeter operating with a xenon lamp under a nitrogen gas flow. The spectra were acquired between 280-180 nm using the following parameters: band width 1 nm, response 2 s, data pitch 0.2 nm, scan speed 20 nm min<sup>-1</sup>, 2 accumulations. The samples were thermostated using a Peltier type temperature controller. Melting curves were measured at 227 nm in a 5-95 °C temperature scan with 1 °C min<sup>-1</sup> speed for peptide **10** and 1 °C min<sup>-1</sup> for **3**. Additional CD spectra were recorded at 5 (before scan) and 95 °C (after the scan) temperatures.

The peptide concentration was 100 μM for **10** and 600 μM for **3** (1.8 mM amide), the spectra were measured in 1 nm path length quartz cells. The buffers were 50 mM with the following compositions: glycine-HCl (pH 3), MES-HCl (pH 6), potassium phosphate (pH 7), Tris-HCl (pH 8), potassium borate (pH 9) and potassium phosphate (pH 11). Buffers were prepared at 150 mM, and added during preparation of the sample along with the peptide from a stock solution. The spectra were converted to circular dichroism units as mean residue values, thus using the amide bond concentration rather than peptide.

Control measurements were performed with 100 μM **10** in pure water and compared with: 1) 500 μM **10** in pure water to exclude the influence of concentration; 2) 150 μM **10** in water:ethylene glycol 1:3 to promote formation of the triple helix under hydrogen bond inducing conditions. Results showed consistently the absence of a notable melting transition. Melting curves were also recorded for 100 μM of peptide Ac-(Pro-Hyp-Gly)-OH in water. The curve shows a weak melting transition with a midpoint about 19 °C.

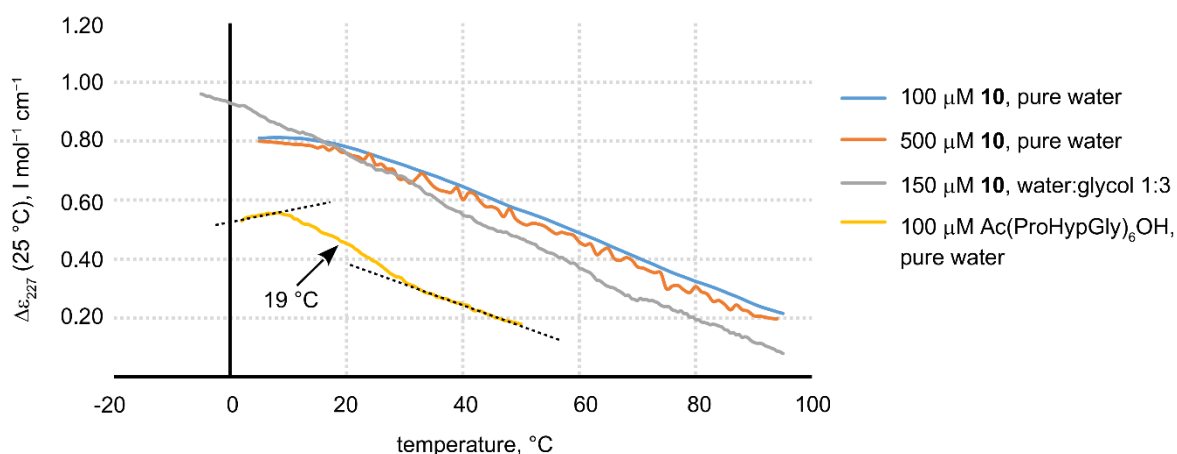

## Dipeptide models

Methyl esters of *N*-acetylamino acids and difluoroethyl esters of *N*-Fmoc amino acids were prepared as previously described.<sup>S1</sup> Lipophilicity values were previously reported.<sup>S2</sup> Distribution coefficient for Amp derivatives were measured in octan-1-ol partitioning against 150 mM buffers at pH 6 (2-(*N*-morpholino)ethanesulfonic acid buffer, MES-HCl), 7 (potassium phosphate buffer), 8 (tris(hydroxymethyl)aminomethane buffer, Tris-HCl). Solutions of model compounds **4-8** were prepared by dissolving 5 mg of the substance in 550  $\mu$ l deuterium oxide. <sup>1</sup>H NMR spectra were measured at 298 and 310 K for reading out the multiplicity of the  $\alpha$ -CH resonances and equilibrium *trans/cis* amide ratios. Rotation velocities were measured in two-dimensional <sup>1</sup>H EXSY spectra at 310 K using mixing times 2 and 3 s. The rotation rate values were calculated as described.<sup>S2</sup>

**Table S2** Experimental ( $\log D$ ) and extrapolated ( $\log D^*$ ) lipophilicity for Amp and lysine derivatives.

| Xaa |      | $\log D_{\text{pH}}$ for Fmoc-Xaa-OCH <sub>2</sub> CHF <sub>2</sub> | $\log D_{\text{pH}}^*$ for Ac-Xaa-OCH <sub>3</sub> |
|-----|------|---------------------------------------------------------------------|----------------------------------------------------|
| Amp | pH 6 | +1.35 $\pm$ 0.09                                                    | [−3.46 $\pm$ 0.27]                                 |
|     | pH 7 | +2.16 $\pm$ 0.06                                                    | [−2.65 $\pm$ 0.24]                                 |
|     | pH 8 | +2.57 $\pm$ 0.10                                                    | [−2.24 $\pm$ 0.28]                                 |
| Lys | pH 6 | +1.00 $\pm$ 0.08                                                    | [−3.81 $\pm$ 0.26]                                 |
|     | pH 7 | +1.31 $\pm$ 0.04                                                    | [−3.50 $\pm$ 0.22]                                 |
|     | pH 8 | +1.60 $\pm$ 0.03                                                    | [−3.21 $\pm$ 0.21]                                 |

**Table S3** Summarized experimental properties of model compounds **4-9**.

| compound        | $\log P/D_{\text{pH}}$ | $K_{\text{trans/cis}}$<br>at 298 K | $k_{\text{trans-to-cis}}$<br>at 310 K, s <sup>−1</sup> | $k_{\text{cis-to-trans}}$<br>at 310 K, s <sup>−1</sup> |
|-----------------|------------------------|------------------------------------|--------------------------------------------------------|--------------------------------------------------------|
| <b>4</b>        | −0.66 $\pm$ 0.03       | 7.03 $\pm$ 0.20                    | 0.013 $\pm$ 0.001                                      | 0.090 $\pm$ 0.008                                      |
| <b>5</b>        | +0.95 $\pm$ 0.03       | 6.61 $\pm$ 0.10                    | 0.009 $\pm$ 0.001                                      | 0.050 $\pm$ 0.008                                      |
| <b>6</b>        | −1.27 $\pm$ 0.03       | 6.43 $\pm$ 0.18                    | 0.006 $\pm$ 0.001                                      | 0.038 $\pm$ 0.003                                      |
| <b>7</b>        | +0.66 $\pm$ 0.04       | 5.51 $\pm$ 0.19                    | 0.010 $\pm$ 0.001                                      | 0.053 $\pm$ 0.005                                      |
| <b>8</b>        | −1.23 $\pm$ 0.08       | 5.54 $\pm$ 0.10                    | 0.009 $\pm$ 0.001                                      | 0.051 $\pm$ 0.009                                      |
| <b>9</b> , pH 6 | [−3.46 $\pm$ 0.27]     | 3.56 $\pm$ 0.10                    | 0.026 $\pm$ 0.002                                      | 0.092 $\pm$ 0.014                                      |
| <b>9</b> , pH 7 | [−2.65 $\pm$ 0.24]     | 3.82 $\pm$ 0.15                    | 0.021 $\pm$ 0.002                                      | 0.079 $\pm$ 0.008                                      |
| <b>9</b> , pH 8 | [−2.24 $\pm$ 0.28]     | 4.98 $\pm$ 0.31                    | 0.013 $\pm$ 0.003                                      | 0.056 $\pm$ 0.013                                      |
| <b>9</b> , pH 9 | -                      | 5.51 $\pm$ 0.19                    | 0.008 $\pm$ 0.001                                      | 0.045 $\pm$ 0.012                                      |

**Table S4** Comparison of the *trans/cis* equilibrium ratios experimentally determined here (by <sup>1</sup>H NMR at 298 K), and previously reported by another group.<sup>S3</sup>

| compound | in deuterium oxide |                              | in deuteriochloroform |                              |
|----------|--------------------|------------------------------|-----------------------|------------------------------|
|          | this work          | from reference <sup>S3</sup> | this work             | from reference <sup>S3</sup> |
| <b>4</b> | 7.03 $\pm$ 0.20    | -                            | 4.23 $\pm$ 0.08       | -                            |
| <b>5</b> | 6.61 $\pm$ 0.10    | -                            | 4.22 $\pm$ 0.05       | -                            |
| <b>6</b> | 6.43 $\pm$ 0.18    | 6.1                          | 4.10 $\pm$ 0.08       | 4.2                          |
| <b>7</b> | 5.51 $\pm$ 0.19    | 5.2                          | 3.98 $\pm$ 0.13       | 3.5                          |
| <b>8</b> | 5.54 $\pm$ 0.10    | 5.8                          | 4.13 $\pm$ 0.20       | 5.2                          |

## Spectral information

### Ammonium transition

Ac-Amp<sup>1</sup>-Pro-Pro-Pro-Pro-Pro-OH transitions in <sup>1</sup>H{<sup>13</sup>C} HSQC spectra:

**A** low pH transition

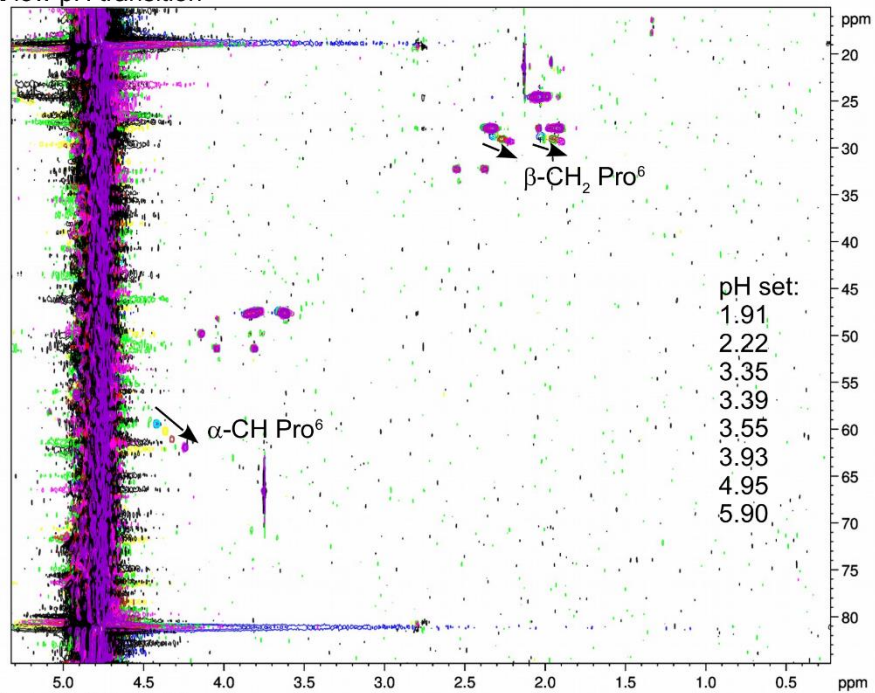

**B** high pH transition

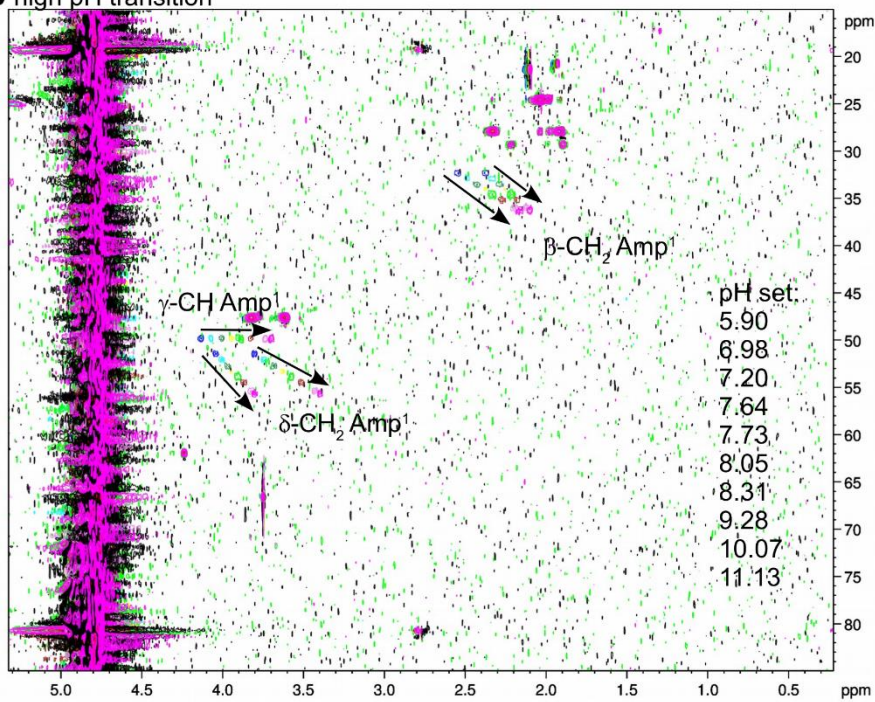

Ac-Pro-Amp<sup>2</sup>-Pro-Pro-Pro-Pro-OH transitions in <sup>1</sup>H{<sup>13</sup>C} HSQC spectra:

**A** low pH transition

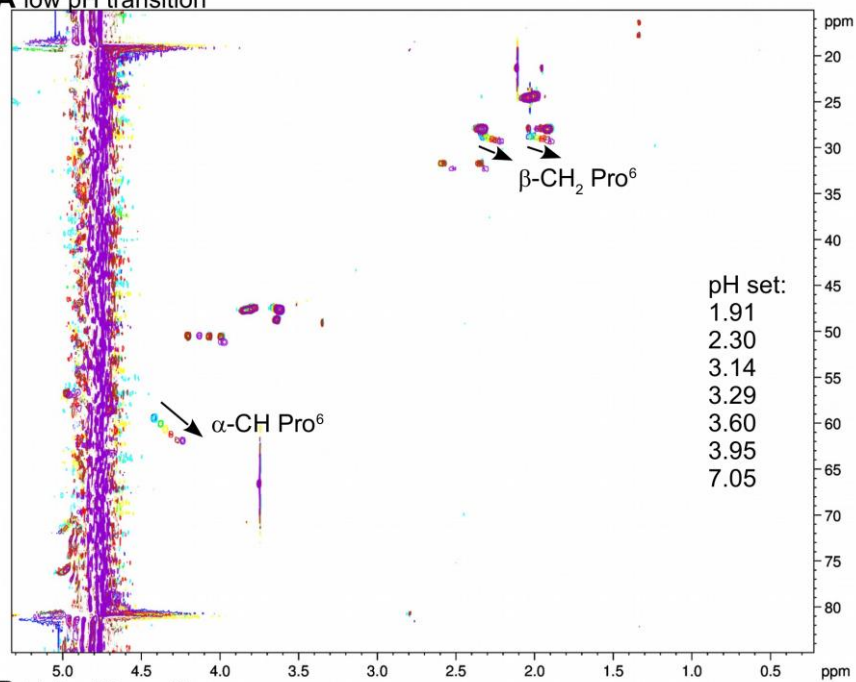

**B** high pH transition

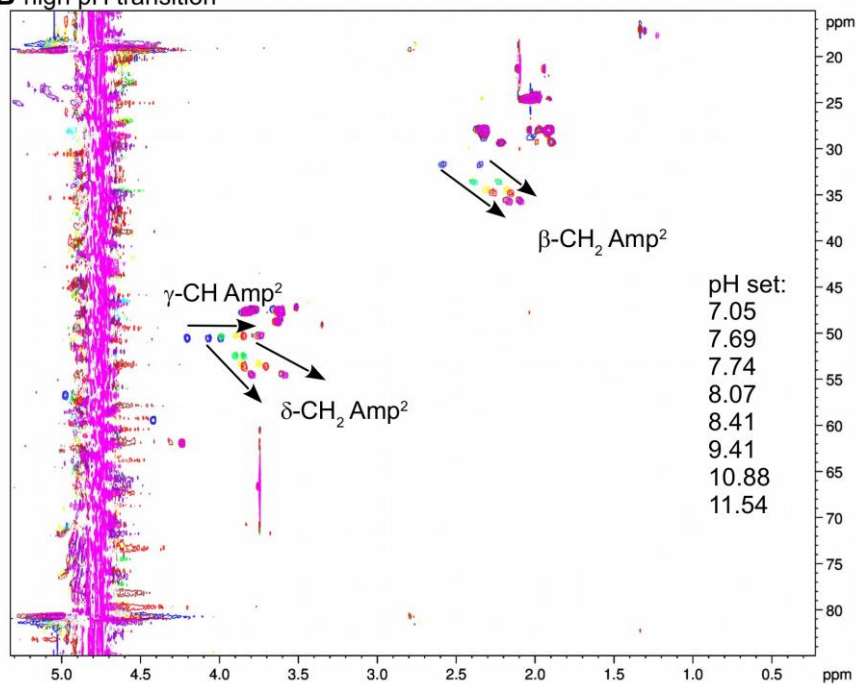



Ac-Pro-Pro-Amp<sup>3</sup>-Pro-Pro-Pro-OH transitions in <sup>1</sup>H{<sup>13</sup>C} HSQC spectra:

**A** low pH transition

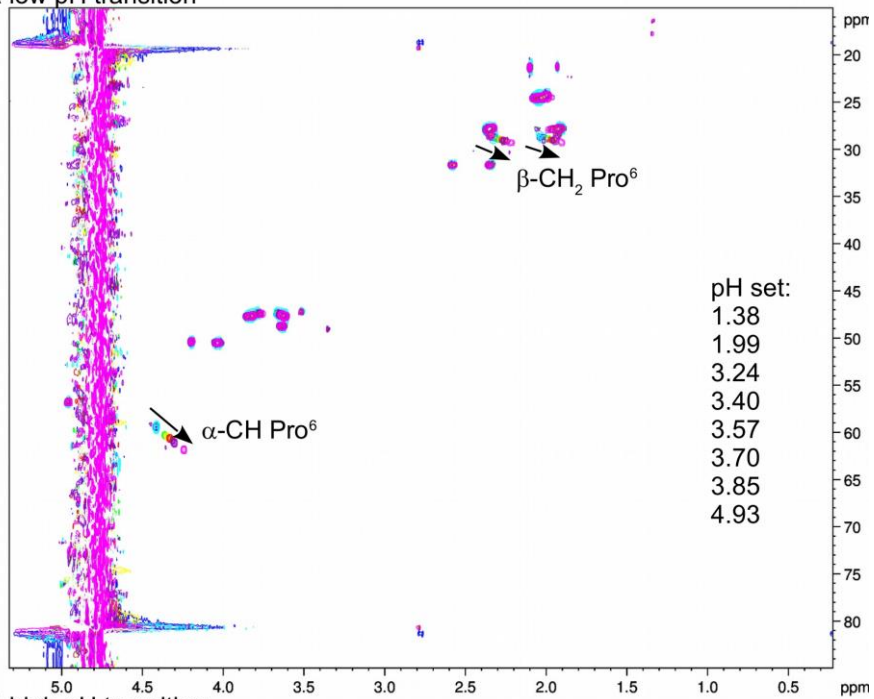

**B** high pH transition

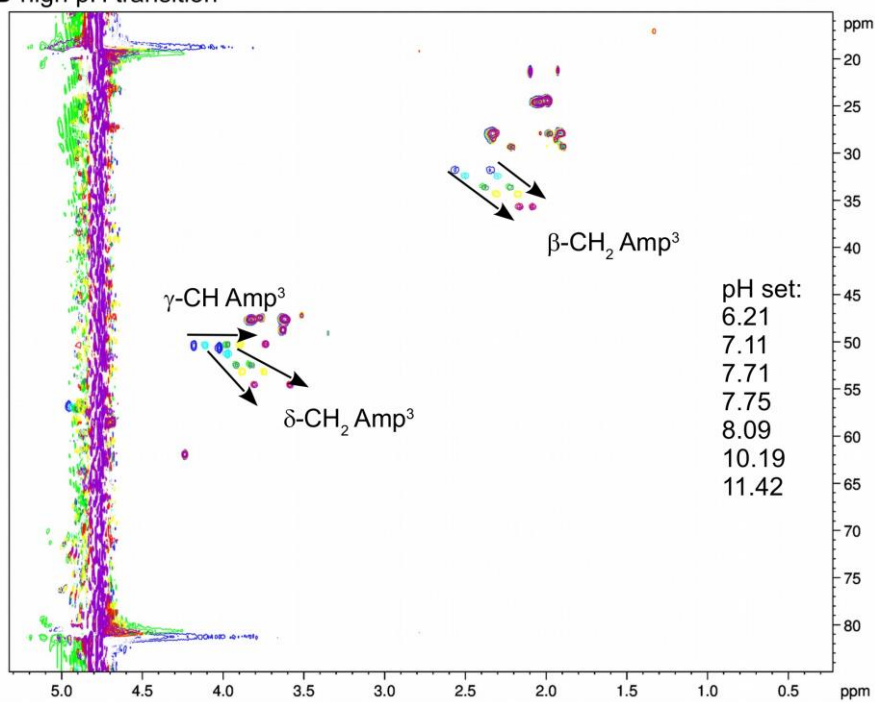

Ac-Pro-Pro-Pro-Amp<sup>4</sup>-Pro-Pro-OH transitions in <sup>1</sup>H W5 spectra:

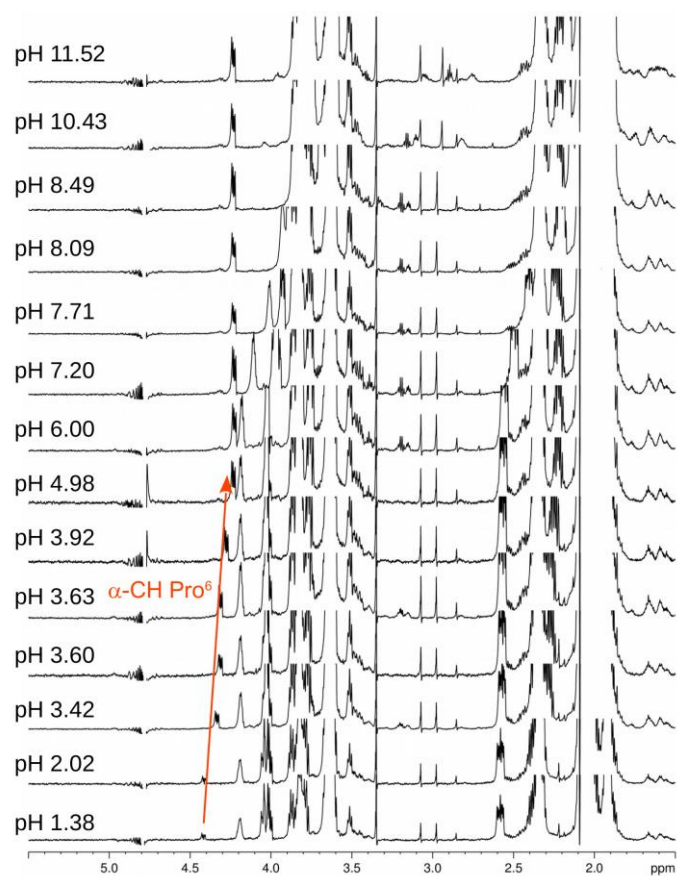

in <sup>1</sup>H{<sup>13</sup>C} HSQC spectra:

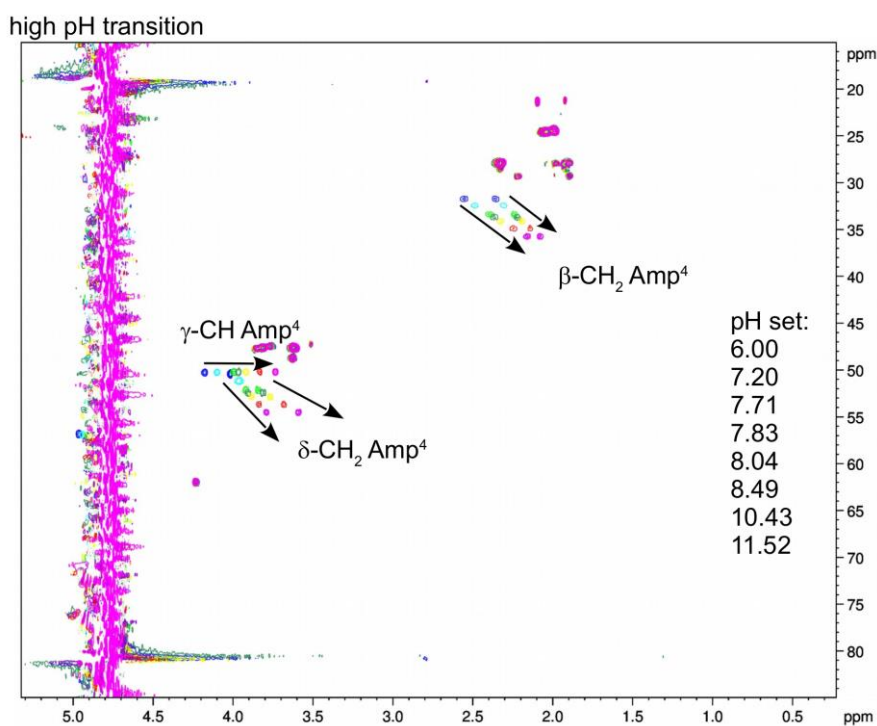

Ac-Pro-Pro-Pro-Pro-Amp<sup>5</sup>-Pro-OH transitions in <sup>1</sup>H W5 spectra:

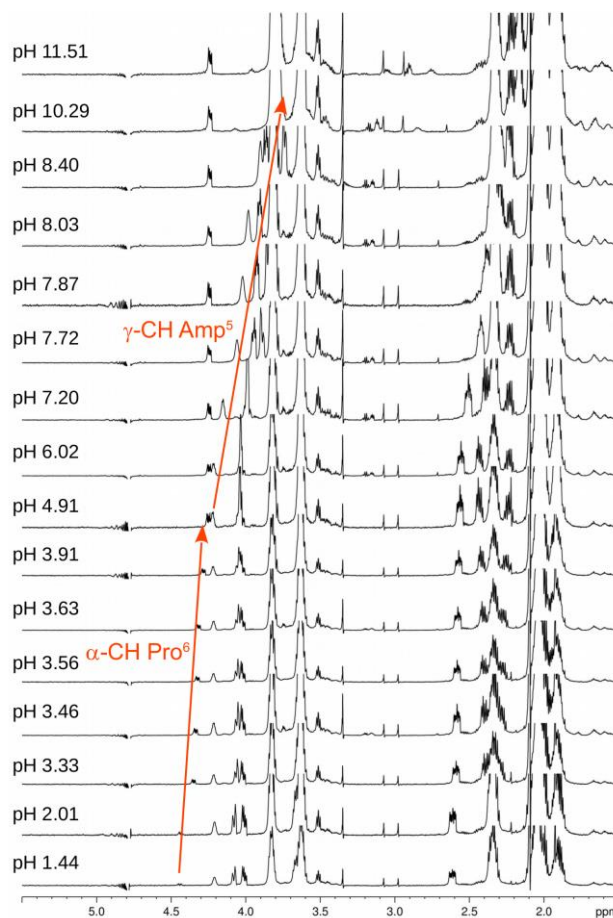

in <sup>1</sup>H{<sup>13</sup>C} HSQC spectra:

high pH transition

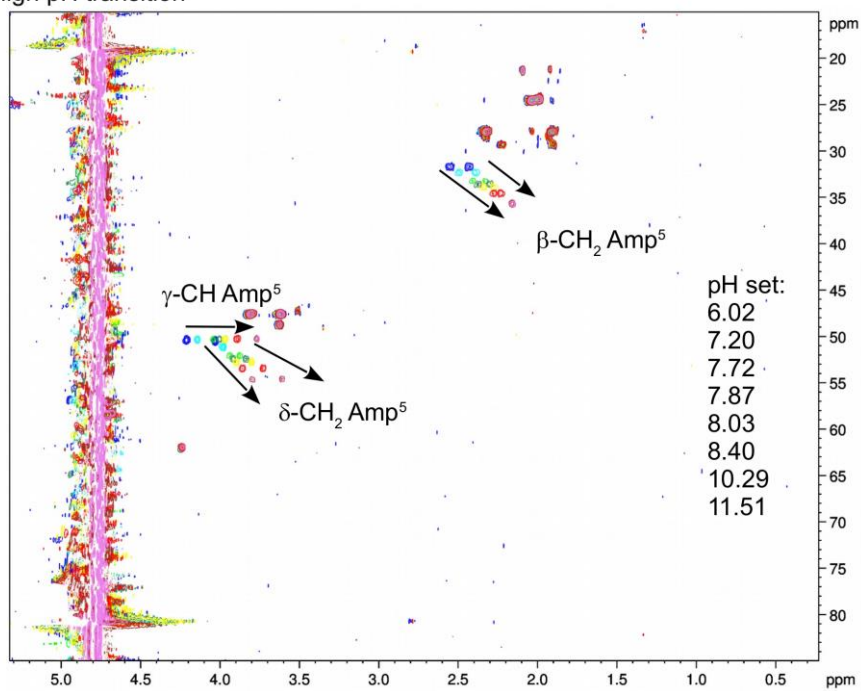

Ac-Pro-Pro-Pro-Pro-Pro-Amp<sup>6</sup>-OH transitions in <sup>1</sup>H{<sup>13</sup>C} HSQC spectra:

**A** low pH transition

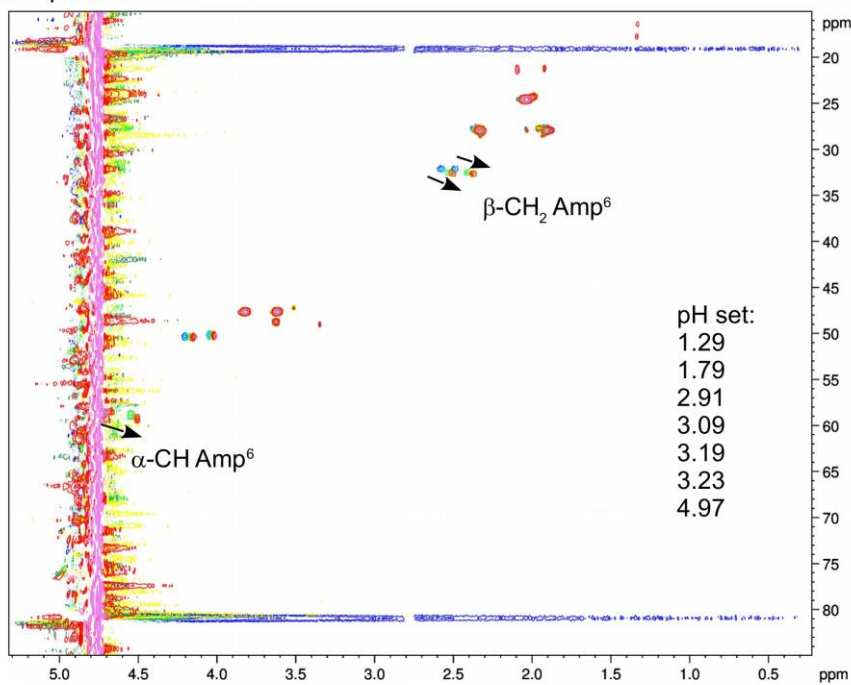

**B** high pH transition

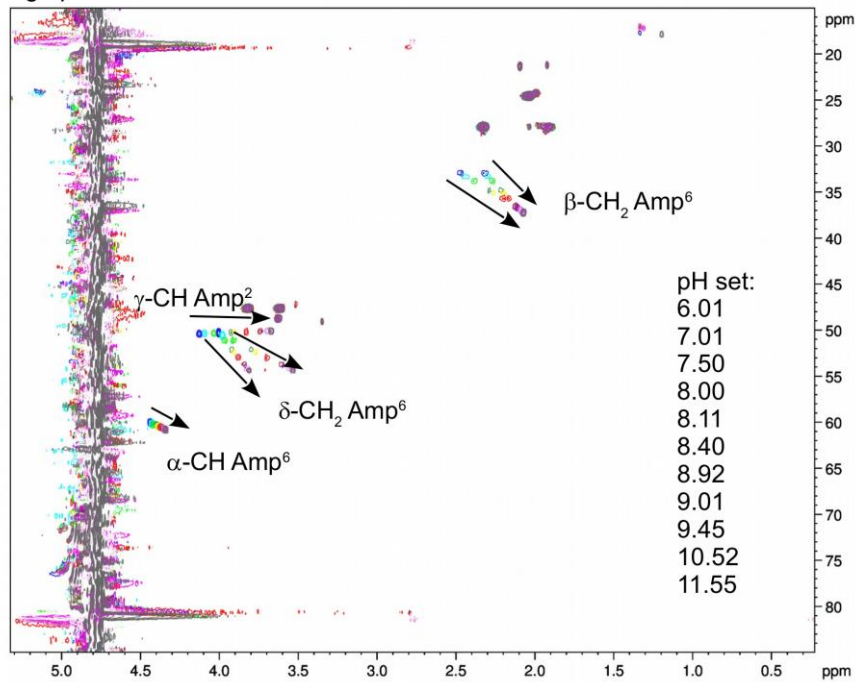

Ac-Pro-Pro-Amp<sup>3</sup>-Amp<sup>4</sup>-Pro-Pro-NH<sub>2</sub> (**1**) transitions in <sup>1</sup>H{<sup>13</sup>C} HSQC spectra:

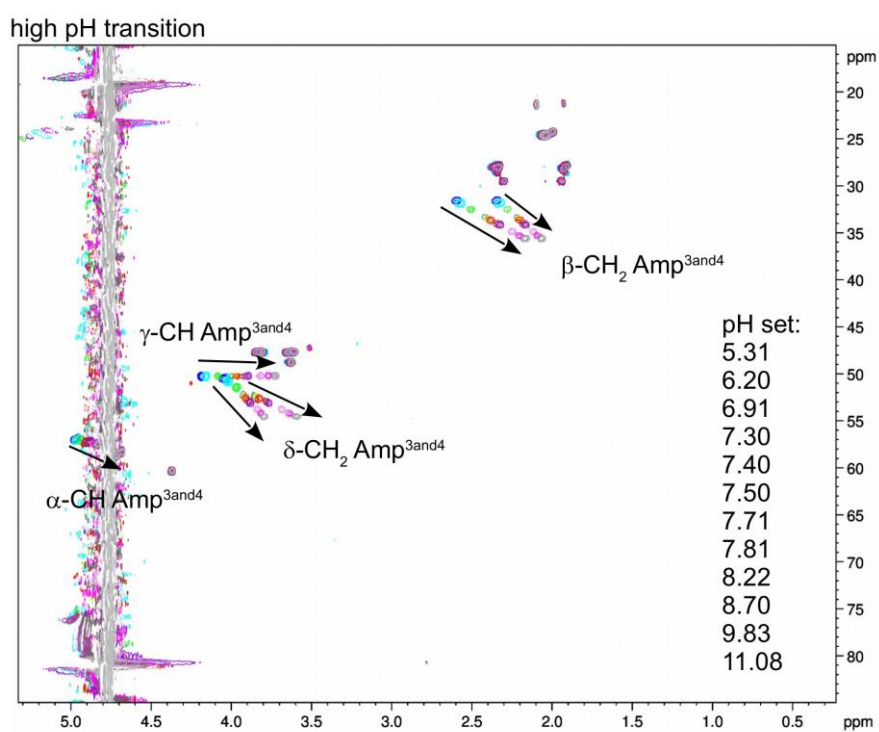

Ac-Amp<sup>1</sup>-Pro-Pro-Pro-Pro-Amp<sup>6</sup>-NH<sub>2</sub> (**2**) transitions in <sup>1</sup>H{<sup>13</sup>C} HSQC spectra:

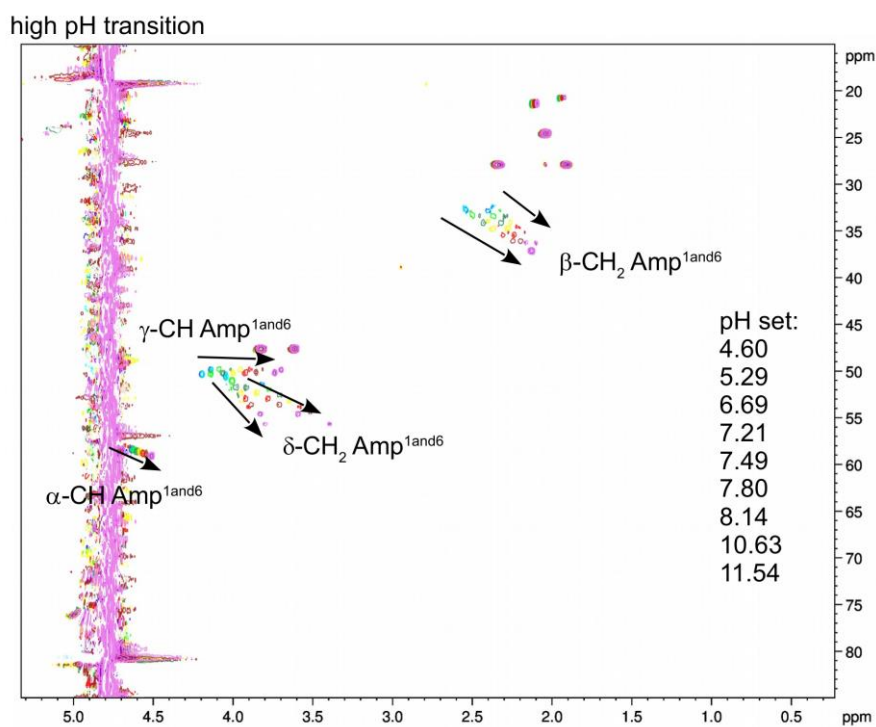

Ac-Pro-Amp-Gly-OH  $\times$  CF<sub>3</sub>CO<sub>2</sub>H (**3**):

<sup>1</sup>H NMR (500 MHz, D<sub>2</sub>O), main rotamer only: 4.72 (m, 2H, Amp  $\alpha$ -CH and Pro  $\alpha$ -CH), 4.25 (m, 1H, Amp  $\gamma$ -CH), 4.09 (m, 2H, Amp  $\delta$ -CH<sub>2</sub>), 3.96 (d,  $J$  = 17.4 Hz, Gly), 3.90 (d,  $J$  = 17.2 Hz, Gly), 3.67 (m, 2H, Pro  $\delta$ -CH<sub>2</sub>), 2.57 (m, 1H, Amp  $\beta$ -CH), 2.46 (m, 1H, Amp  $\beta$ -CH), 2.36 (m, 1H, Pro  $\beta$ -CH), 2.13 (s, 3H, CH<sub>3</sub>CO), 2.07-1.90 (m, 3H, Pro  $\beta$ -CH and Pro  $\gamma$ -CH<sub>2</sub>).

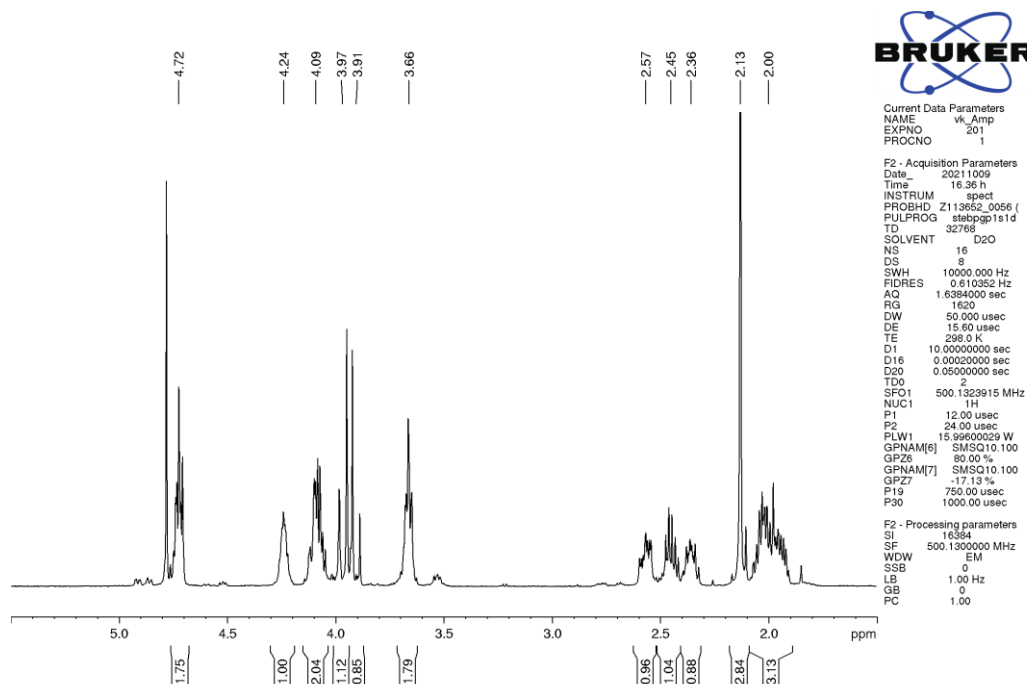

The ammonium transition was followed by a series of <sup>1</sup>H spectra with W5 water suppression scheme and <sup>1</sup>H{<sup>13</sup>C} HSQC at certain pH points as shown below:

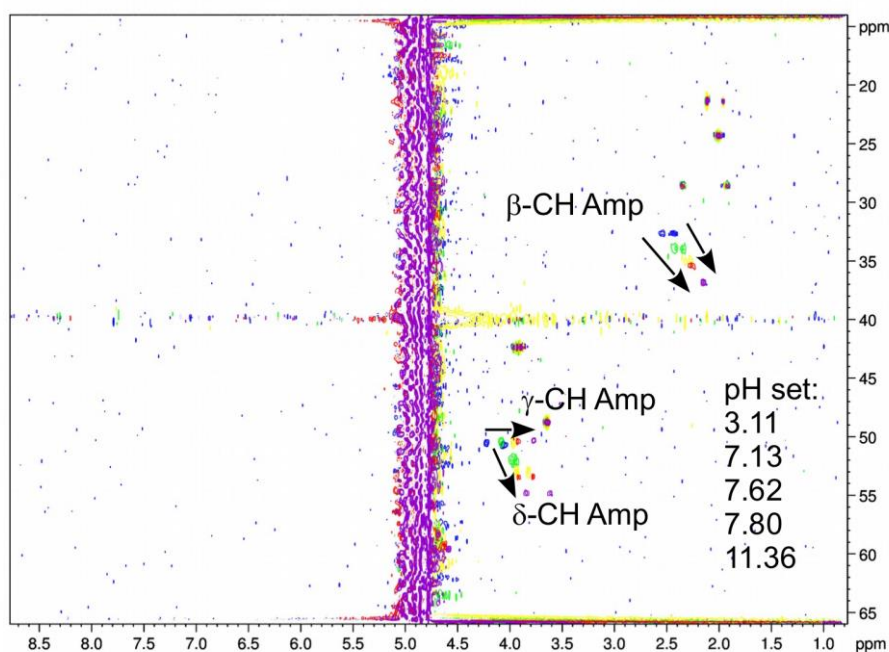

## NMR data for compounds 4-9

AcFlpOCH<sub>3</sub>, **4**:

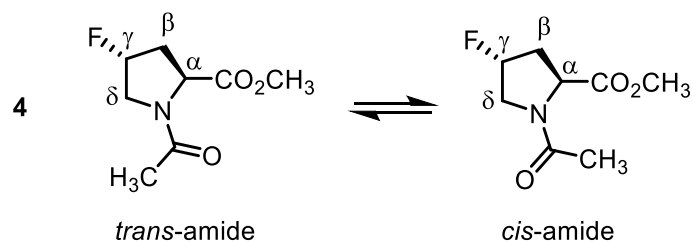

<sup>1</sup>H NMR (500 MHz, D<sub>2</sub>O): *trans*-amide: 5.46 (dt, *J* = 51.7, 2.9 Hz, 1H, γ-CH), 4.59 (dd, *J* = 9.4, 8.4 Hz, 1H, α-CH), 4.04 (ddd, *J* = 21.8, 12.9, 1.7 Hz, 1H, δ-CH), 3.91 (ddd, *J* = 38.1, 12.8, 2.8 Hz, 1H, δ-CH), 3.79 (s, 3H, CH<sub>3</sub>O), 2.72 (dddt, *J* = 18.2, 15.0, 7.8, 1.0, 1H, β-CH), 2.23 (dddd, *J* = 42.0, 14.9, 10.2, 3.9 Hz, 1H, β-CH), 2.16 (s, 3H, CH<sub>3</sub>); *cis*-amide: 5.39 (dt, *J* = 52.3, 3.1 Hz, 1H, γ-CH), 4.93 (t, *J* = 8.5 Hz, 1H, α-CH), 4.14 (ddd, *J* = 21.0, 14.1, 2.3 Hz, 1H, δ-CH), 3.84 (s, 3H, CH<sub>3</sub>O), 3.55 (ddd, *J* = 37.3, 14.0, 3.0 Hz, 1H, δ-CH), 2.86 (dddt, *J* = 20.9, 15.4, 8.4, 1.2 Hz, 1H, β-CH), 2.45 (dddd, *J* = 39.1, 15.0, 8.2, 4.4 Hz, 1H, β-CH), 2.05 (s, CH<sub>3</sub>).

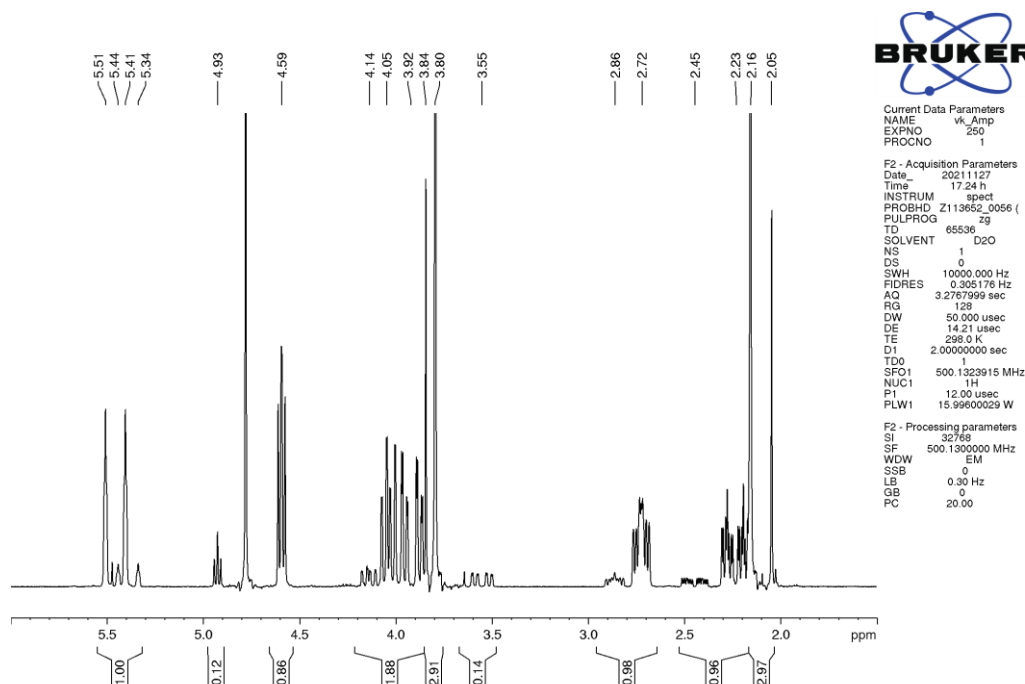

$^{19}\text{F}\{^1\text{H}\}$  NMR (471 MHz,  $\text{D}_2\text{O}$ ): *trans*-amide: -177.73 (s); *cis*-amide: -177.67 (s).

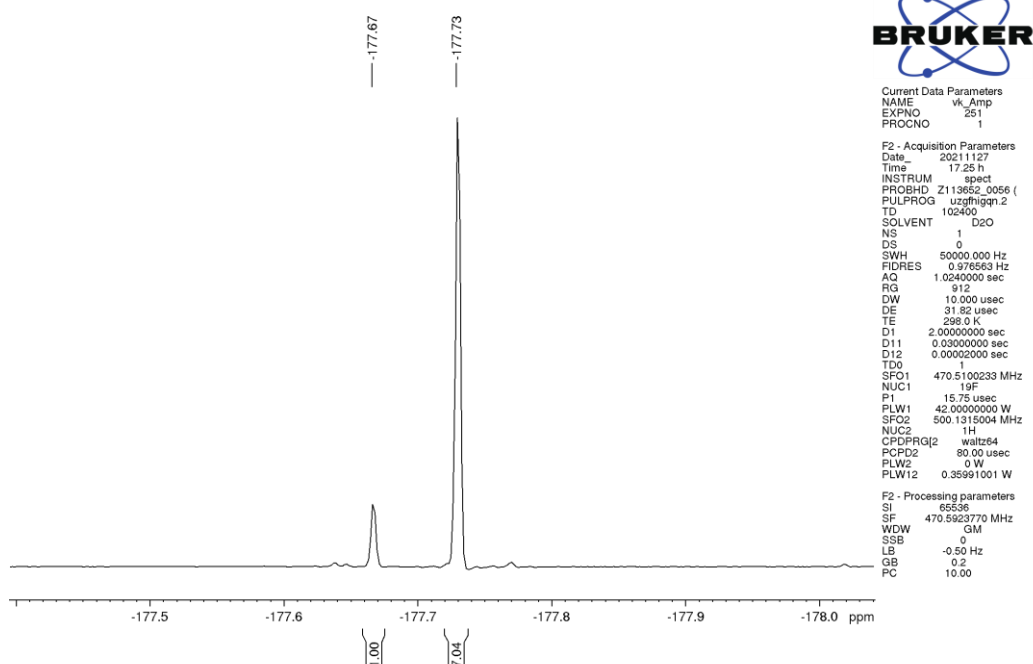

$^{13}\text{C}\{^1\text{H}\}$  NMR (126 MHz,  $\text{D}_2\text{O}$ ): *trans*-amide: 174.4 (s,  $\text{CO}_2\text{Me}$ ), 173.3 (s, CNO), 92.9 (d,  $J = 175$  Hz,  $\gamma$ -CH), 57.7 (s,  $\alpha$ -CH), 54.6 (d,  $J = 22$  Hz,  $\delta$ - $\text{CH}_2$ ), 53.2 (s,  $\text{CH}_3\text{O}$ ), 35.7 (d,  $J = 22$  Hz,  $\beta$ - $\text{CH}_2$ ), 21.4 (s,  $\text{CH}_3$ ); *cis*-amide: 174.1 (two s,  $\text{CO}_2\text{Me}$  and CON), 91.5 (d,  $J = 175$  Hz,  $\gamma$ -CH), 58.6 (s,  $\alpha$ -CH), 53.5 (s,  $\text{CH}_3\text{O}$ ), 52.9 (d,  $J = 22$  Hz,  $\delta$ - $\text{CH}_2$ ), 37.2 (d,  $J = 23$  Hz,  $\beta$ - $\text{CH}_2$ ), 20.9 (s,  $\text{CH}_3$ ).

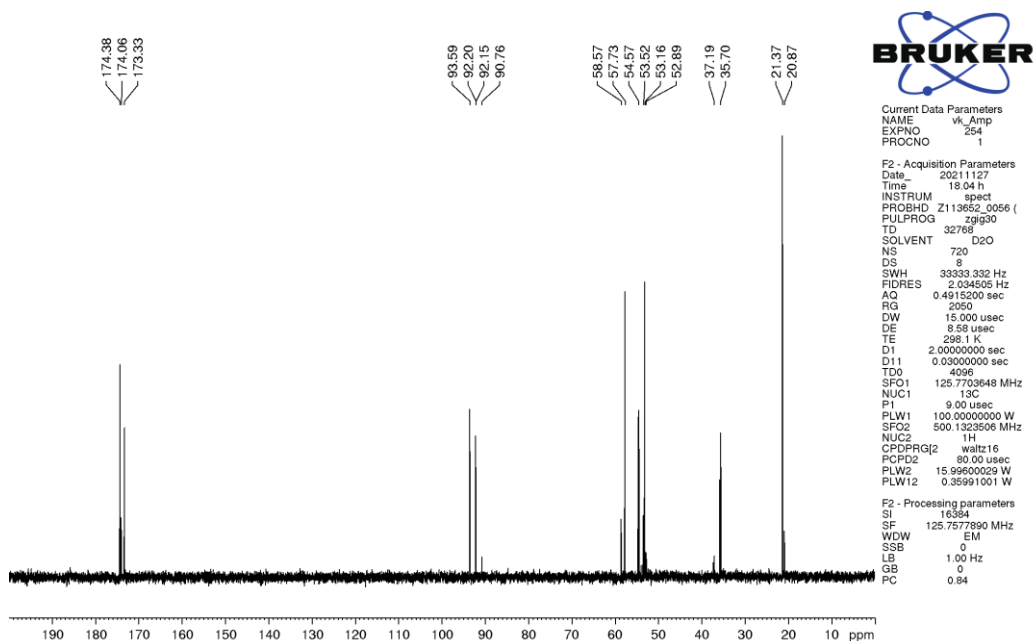



Ac(Bn)HypOCH<sub>3</sub>, **5**:

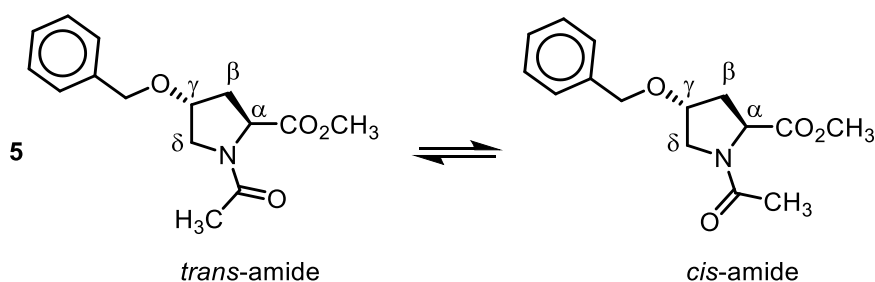

<sup>1</sup>H NMR (500 MHz, D<sub>2</sub>O): *trans*-amide: 7.47-7.40 (m, 5H, Ph), 4.68 (d, *J* = 11.7 Hz, 1H, CHPh), 4.60 (d, *J* = 11.6 Hz, 1H, CHPh), 4.52 (t, *J* = 8.4 Hz, 1H, α-CH), 4.46 (m, 1H, γ-CH), 3.80 (m, 2H, δ-CH<sub>2</sub>), 3.78 (s, 3H, CH<sub>3</sub>O), 2.56 (dddd, *J* = 13.8, 8.0, 2.2, 1.3 Hz, 1H, β-CH), 2.16 (ddd, *J* = 13.8, 8.8, 4.6 Hz, 1H, β-CH), 2.06 (s, 3H, CH<sub>3</sub>); *cis*-amide: 7.47-7.40 (m, 5H, Ph), 4.81 (m, 1H, α-CH), 4.64-4.57 (m, 2H, CH<sub>2</sub>Ph), 4.38 (m, 1H, γ-CH), 3.88 (dt, *J* = 12.8, 2.0 Hz, 1H, δ-CH), 3.83 (s, 3H, CH<sub>3</sub>O), 3.53 (dd, *J* = 12.7, 4.6 Hz, 1H, δ-CH), 2.63 (dddd, *J* = 13.7, 8.7, 3.6, 1.7 Hz, β-CH), 2.38 (ddd, *J* = 13.8, 6.3, 5.2 Hz, 1H, β-CH), 2.01 (s, 3H, CH<sub>3</sub>).

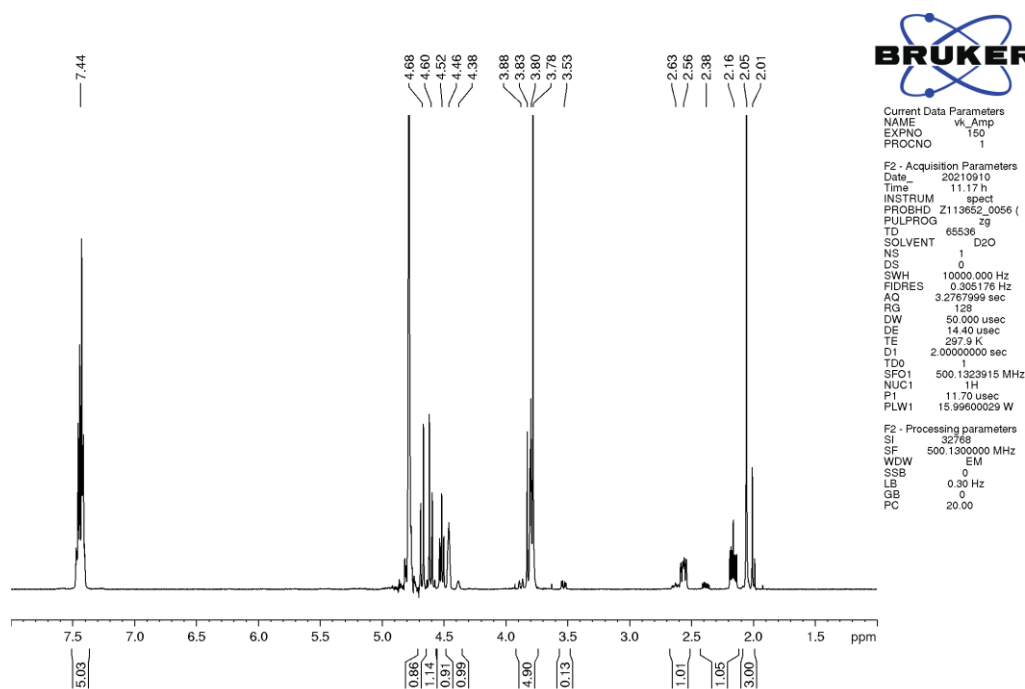

$^{13}\text{C}\{^1\text{H}\}$  NMR (126 MHz,  $\text{D}_2\text{O}$ ): *trans*-amide: 174.6 ( $\text{CO}_2\text{Me}$ ), 173.2 (CON), 137.3 (C, Ph), 128.9 (CH, Ph), 128.5 (CH, Ph), 128.3 (CH, Ph), 77.5 ( $\gamma\text{-CH}$ ), 71.0 ( $\text{CH}_2\text{Ph}$ ), 57.8 ( $\alpha\text{-CH}$ ), 53.5 ( $\delta\text{-CH}_2$ ), 53.2 ( $\text{CH}_3\text{O}$ ), 34.6 ( $\beta\text{-CH}_2$ ), 21.3 ( $\text{CH}_3$ ); *cis*-amide (only resolved signals): 174.2 ( $\text{CO}_2\text{Me}$ ), 173.8 (CON), 76.0 ( $\gamma\text{-CH}$ ), 59.0 ( $\alpha\text{-CH}$ ), 53.5 ( $\text{CH}_3\text{O}$ ), 51.3 ( $\delta\text{-CH}_2$ ), 36.2 ( $\beta\text{-CH}_2$ ), 20.7 ( $\text{CH}_3$ ).

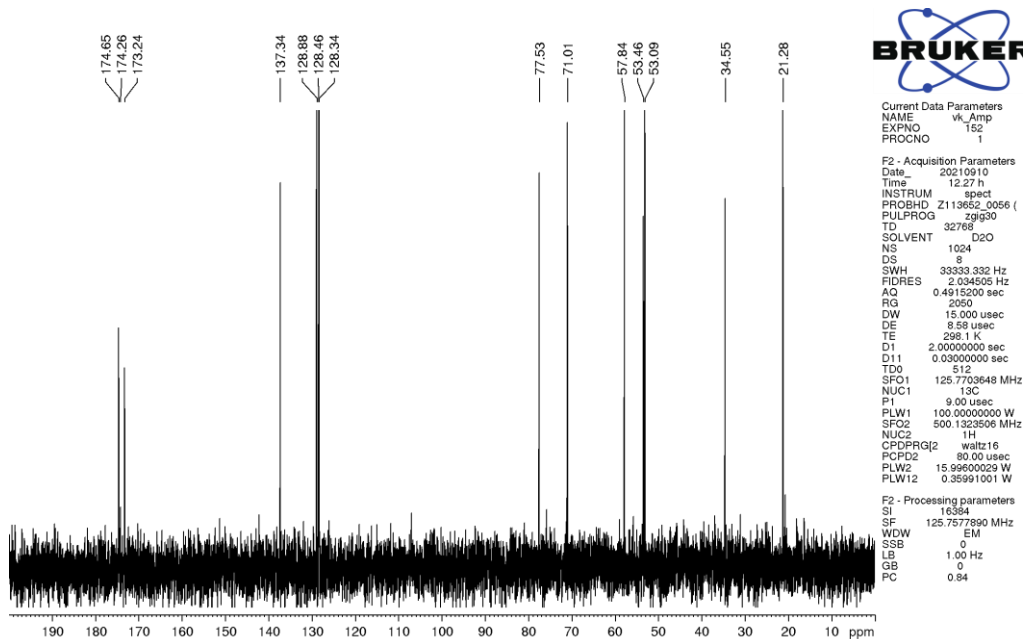

AcHypOCH<sub>3</sub>, **6**:

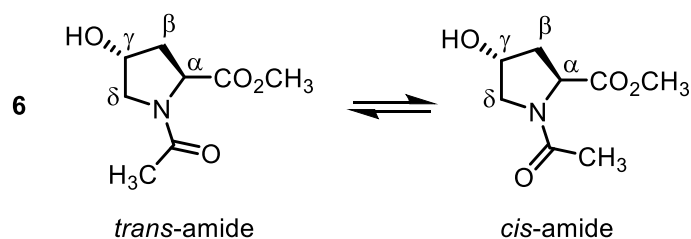

<sup>1</sup>H NMR (500 MHz, D<sub>2</sub>O): *trans*-amide: 4.61 (m, 1H, γ-CH), 4.55 (t, *J* = 8.5 Hz, 1H, α-CH), 3.85 (dd, *J* = 11.7, 4.1 Hz, 1H, δ-CH), 3.79 (s, 3H, CH<sub>3</sub>O), 3.67 (dt, *J* = 11.8, 1.7 Hz, 1H, δ-CH), 2.39 (ddt, *J* = 13.9, 7.9, 2.2 Hz, 1H, β-CH), 2.18 (ddd, *J* = 13.7, 8.9, 4.5 Hz, 1H, β-CH), 2.15 (s, 3H, CH<sub>3</sub>); *cis*-amide: 4.83 (m, 1H, α-CH), 4.54 (m, 1H, γ-CH), 3.83 (s, 3H, CH<sub>3</sub>O), 3.71 (dt, *J* = 12.6, 2.2 Hz, 1H, δ-CH), 3.56 (dd, *J* = 12.6, 4.6 Hz, 1H, δ-CH), 2.50 (dddd, *J* = 13.9, 8.6, 3.6, 1.9 Hz, 1H, β-CH), 2.37 (m, 1H, β-CH), 2.03 (s, 3H, CH<sub>3</sub>).

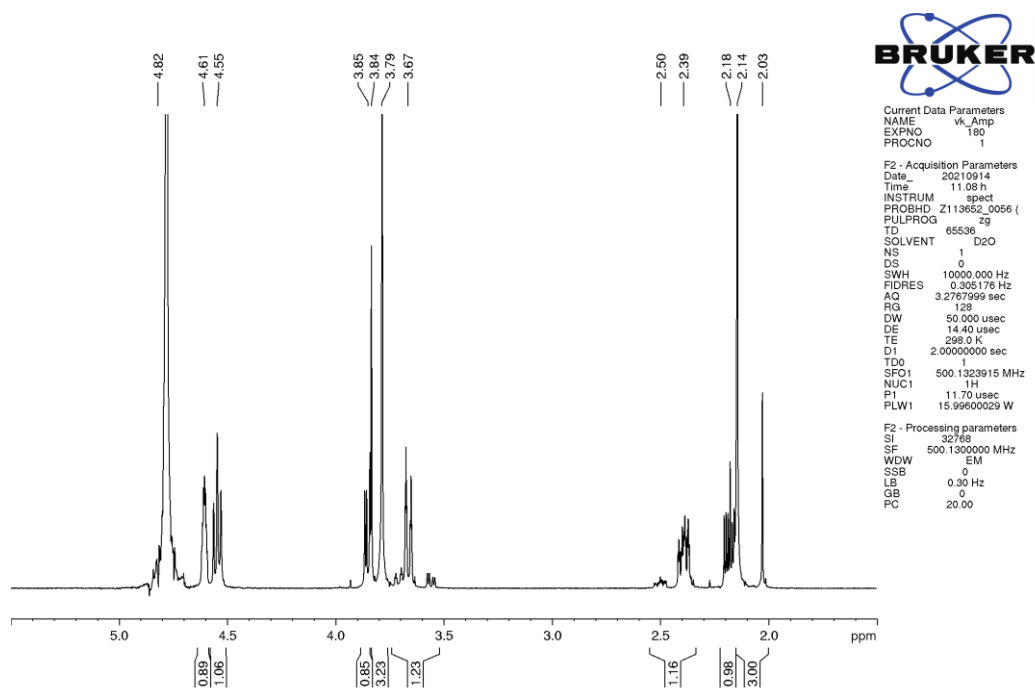

$^{13}\text{C}\{^1\text{H}\}$  NMR (126 MHz,  $\text{D}_2\text{O}$ ): *trans*-amide: 174.8 ( $\text{CO}_2\text{Me}$ ), 173.4 (CON), 69.8 ( $\gamma\text{-CH}$ ), 57.8 ( $\alpha\text{-CH}$ ), 55.9 ( $\delta\text{-CH}_2$ ), 53.1 ( $\text{CH}_3\text{O}$ ), 37.1 ( $\beta\text{-CH}_2$ ), 21.4 ( $\text{CH}_3$ ); *cis*-amide: 174.4 ( $\text{CO}_2\text{Me}$ ), 174.1 (CON), 68.2 ( $\gamma\text{-CH}$ ), 58.9 ( $\alpha\text{-CH}$ ), 53.9 ( $\delta\text{-CH}_2$ ), 53.5 ( $\text{CH}_3\text{O}$ ), 38.4 ( $\beta\text{-CH}_2$ ), 20.8 ( $\text{CH}_3$ ).

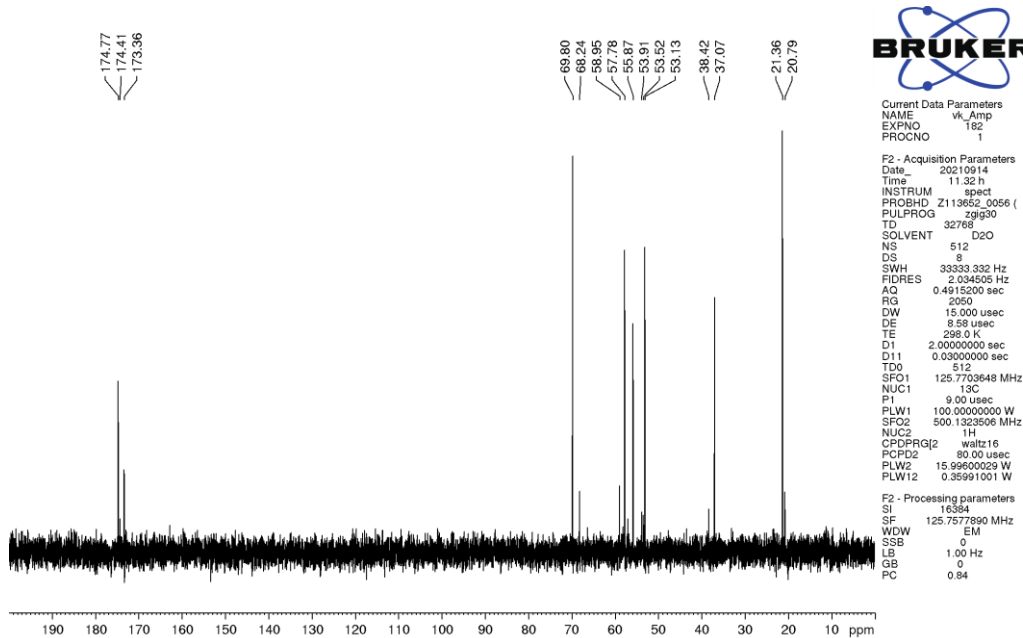

Ac(Boc)AmpOCH<sub>3</sub>, **7**:

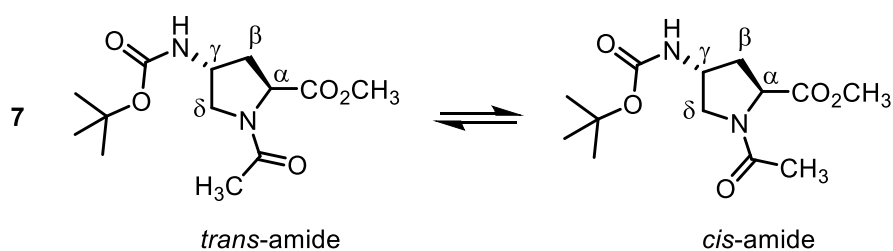

<sup>1</sup>H NMR (500 MHz, D<sub>2</sub>O): *trans*-amide: 4.55 (t, *J* = 7.4 Hz, 1H, α-CH), 4.29 (m, 1H, γ-CH), 3.95 (dd, *J* = 11.0, 6.1 Hz, 1H, δ-CH), 3.79 (s, 3H, CH<sub>3</sub>O), 3.55 (dd, *J* = 11.0, 4.7 Hz, 1H, δ-CH), 2.30 (m, 2H, β-CH<sub>2</sub>), 2.14 (s, 3H, CH<sub>3</sub>CO), 1.45 (s, 9H, Boc); *cis*-amide: 4.82 (m, 1H, α-CH), 4.20 (m, 1H, γ-CH), 3.84 (s, 3H, CH<sub>3</sub>O), 3.75 (dd, *J* = 11.7, 6.9 Hz, 1H, δ-CH), 3.46 (dd, *J* = 11.7, 6.0 Hz, 1H, δ-CH), 2.48 (m, 1H, β-CH), 2.38 (m, 1H, β-CH), 2.03 (s, CH<sub>3</sub>CO), 1.45 (s, 9H, Boc).

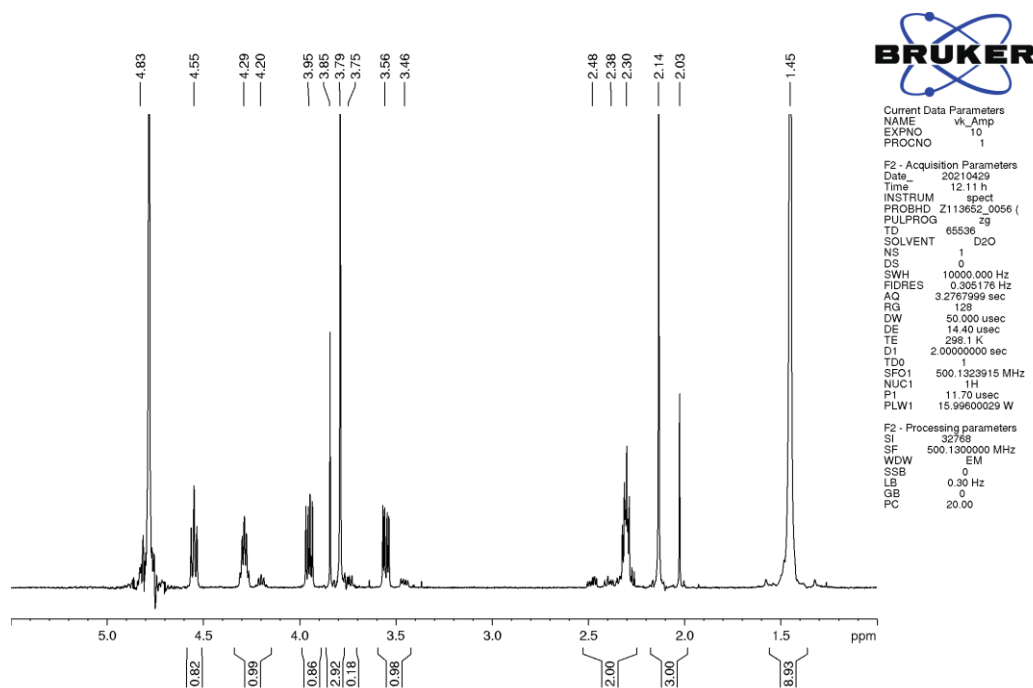

$^{13}\text{C}\{^1\text{H}\}$  NMR (126 MHz,  $\text{D}_2\text{O}$ ): *trans*-amide: 174.3 (ester CO), 173.3 (amide CO), 157.59 (carbamate CO), 81.5 ( $\text{CMe}_3$ ), 57.7 ( $\alpha\text{-CH}$ ), 53.2 ( $\text{CH}_3\text{O}$  and  $\delta\text{-CH}_2$ ), 49.8 ( $\gamma\text{-CH}$ ), 34.4 ( $\beta\text{-CH}_2$ ), 27.7 ( $3\times\text{CH}_3$ ), 21.3 (acetyl  $\text{CH}_3$ ); *cis*-amide: 173.3 (ester CO), 173.7 (amide CO), 157.64 (carbamate CO), 81.5 ( $\text{CMe}_3$ ), 59.3 ( $\alpha\text{-CH}$ ), 53.6 ( $\text{CH}_3\text{O}$ ), 51.1 ( $\delta\text{-CH}_2$ ), 48.0 ( $\gamma\text{-CH}$ ), 35.8 ( $\beta\text{-CH}_2$ ), 27.7 ( $3\times\text{CH}_3$ ), 20.8 (acetyl  $\text{CH}_3$ ).

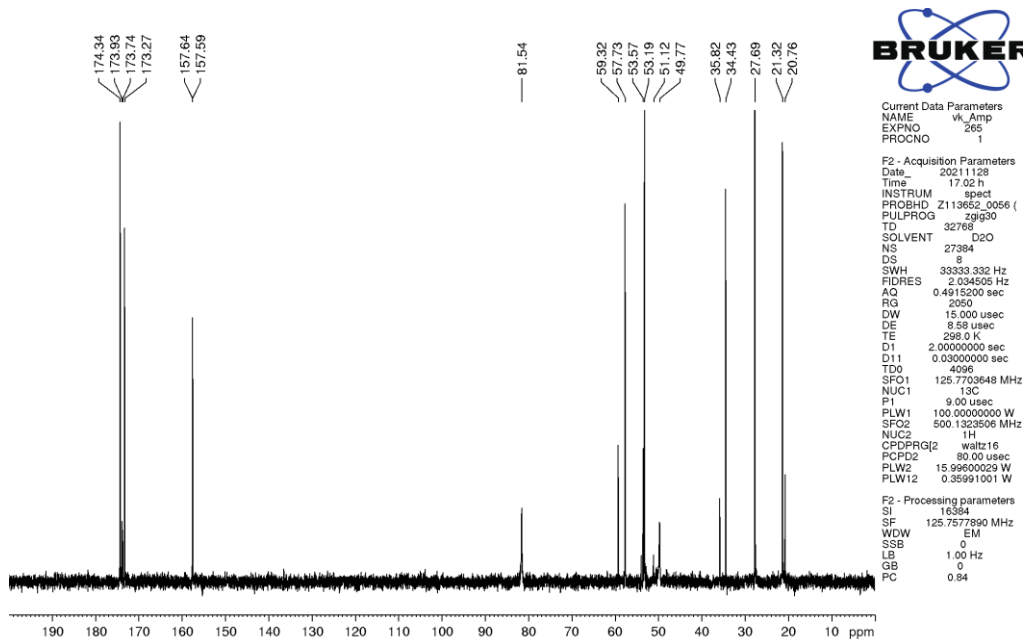

Ac(Ac)AmpOCH<sub>3</sub>, **8**:

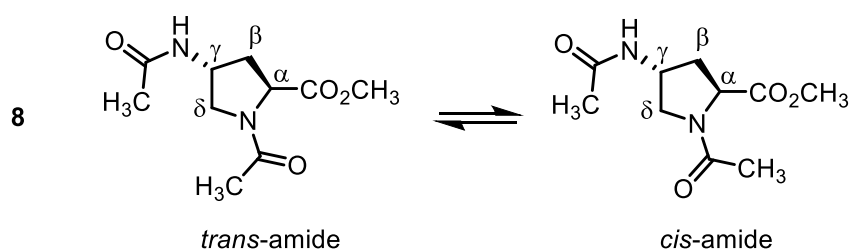

<sup>1</sup>H NMR (500 MHz, D<sub>2</sub>O): *trans*-amide: 4.57 (dd, *J* = 8.0, 7.2 Hz, 1H, α-CH), 4.49 (m, 1H, γ-CH), 3.97 (dd, *J* = 11.3, 6.1 Hz, δ-CH), 3.79 (s, 3H, CH<sub>3</sub>O), 3.59 (dd, *J* = 11.3, 4.4 Hz, 1H, δ-CH), 2.33 (m, 2H, β-CH<sub>2</sub>), 2.13 (s, 3H, Ac), 2.00 (s, 3H, γ-Ac); *cis*-amide: 4.84 (dd, *J* = 8.9, 4.3 Hz, 1H, α-CH), 4.42 (m, 1H, γ-CH), 3.90 (m, 1H, δ-CH), 3.84 (s, 3H, CH<sub>3</sub>O), 3.49 (dd, *J* = 12.3, 6.2 Hz, δ-CH), 2.50 (m, 1H, β-CH), 2.42 (m, 1H, β-CH), 2.03 (s, 3H, Ac), 1.99 (s, 3H, γ-Ac).

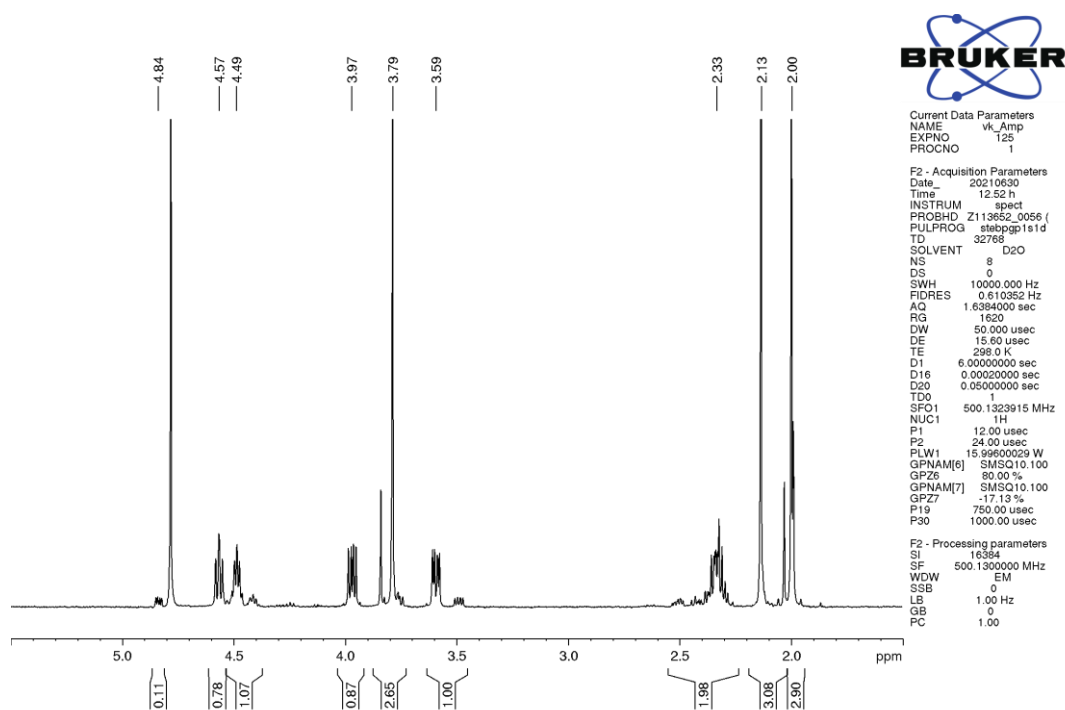

$^{13}\text{C}\{^1\text{H}\}$  NMR (126 MHz,  $\text{D}_2\text{O}$ ): *trans*-amide: 174.24 ( $\text{CO}_2\text{Me}$ ), 174.21 ( $\gamma\text{-CON}$ ), 173.3 ( $\text{CON}$ ), 57.7 ( $\alpha\text{-CH}$ ), 53.2 ( $\text{CH}_3\text{O}$ ), 52.7 ( $\delta\text{-CH}_2$ ), 48.9 ( $\gamma\text{-CH}$ ), 34.1 ( $\beta\text{-CH}_2$ ), 21.8 ( $\gamma\text{-CH}_3$ ), 21.3 ( $\text{CH}_3$ ); *cis*-amide: 174.17 ( $\gamma\text{-CON}$ ), 173.79 ( $\text{CON}$ ), 173.74 ( $\text{CO}_2\text{Me}$ ), 59.3 ( $\alpha\text{-CH}$ ), 53.6 ( $\text{CH}_3\text{O}$ ), 50.7 ( $\delta\text{-CH}_2$ ), 47.3 ( $\gamma\text{-CH}$ ), 35.5 ( $\beta\text{-CH}_2$ ), 21.8 ( $\gamma\text{-CH}_3$ ), 20.8 ( $\text{CH}_3$ ).

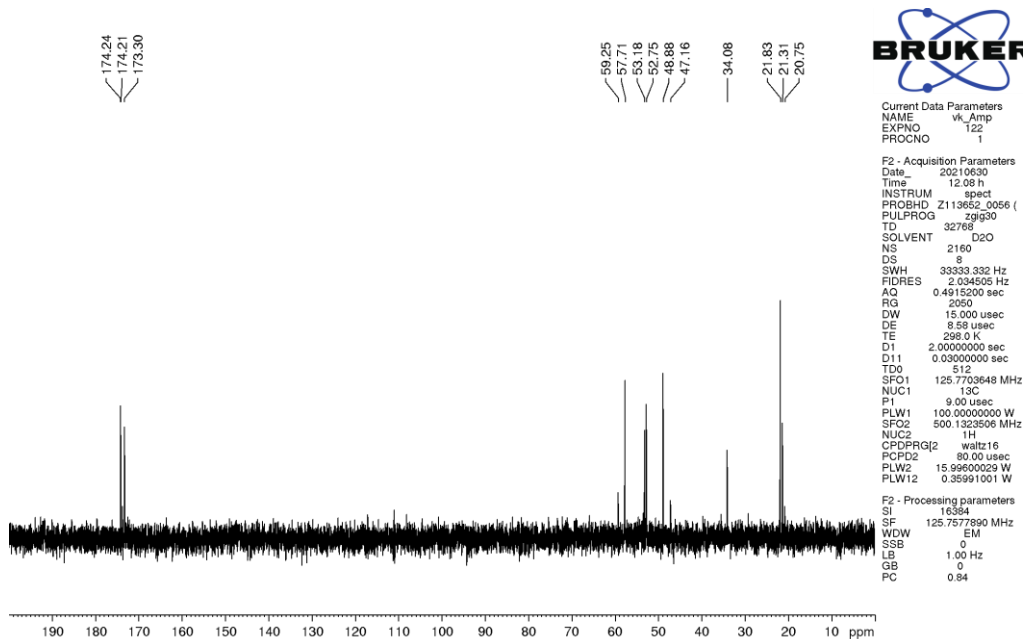



AcAmpOCH<sub>3</sub>×HCl, **9**:

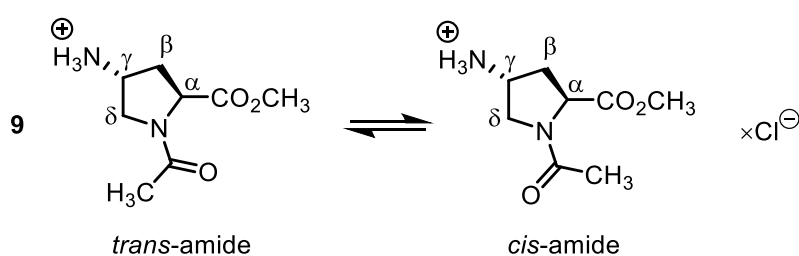

<sup>1</sup>H NMR (500 MHz, D<sub>2</sub>O): *trans*-amide: 4.69 (dd, *J* = 8.4, 7.0 Hz, 1H, α-CH), 4.17 (m, 1H, γ-CH), 4.12 (dd, *J* = 11.7, 6.1 Hz, 1H, δ-CH), 3.84 (dd, *J* = 11.8, 4.0 Hz, 1H, δ-CH), 3.80 (s, 3H, CH<sub>3</sub>O), 2.54 (m, 2H, β-CH<sub>2</sub>), 2.17 (s, 3H, CH<sub>3</sub>CO); *cis*-amide: 4.95 (dd, *J* = 9.0, 4.2 Hz, 1H, α-CH), 4.09 (m, 1H, γ-CH), 3.77 (m, 1H, δ-CH), 3.69 (m, 1H, δ-CH), 2.72 (m, 1H, β-CH), 2.62 (m, 1H, β-CH), 2.07 (s, 3H, CH<sub>3</sub>CO).

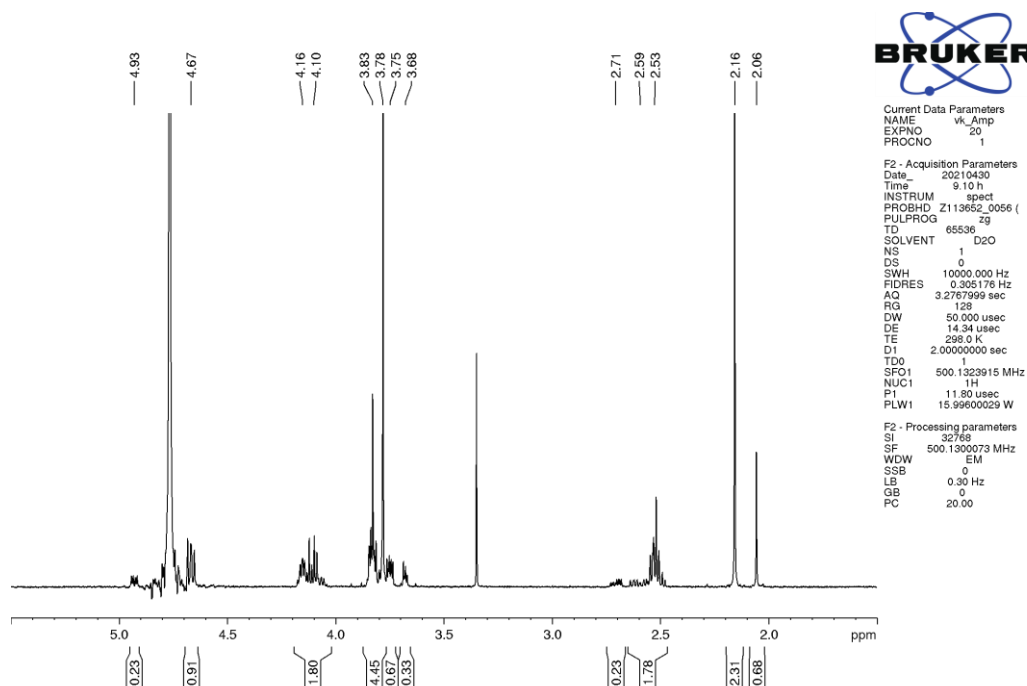

$^{13}\text{C}\{^1\text{H}\}$  NMR (126 MHz,  $\text{D}_2\text{O}$ ): *trans*-amide: 173.4 ( $\text{CO}_2\text{Me}$ ), 173.3 (CON), 57.3 ( $\alpha\text{-CH}$ ), 53.3 ( $\text{CH}_3\text{O}$ ), 51.0 ( $\delta\text{-CH}_2$ ), 49.6 ( $\gamma\text{-CH}$ ), 32.5 ( $\beta\text{-CH}_2$ ), 21.4 ( $\text{CH}_3$ ); *cis*-amide: 173.8 (CON), 173.0 ( $\text{CO}_2\text{Me}$ ), 58.9 ( $\alpha\text{-CH}$ ), 53.6 ( $\text{CH}_3\text{O}$ ), 49.1 ( $\delta\text{-CH}_2$ ), 48.0 ( $\gamma\text{-CH}$ ), 33.9 ( $\beta\text{-CH}_2$ ), 20.9 ( $\text{CH}_3$ ).

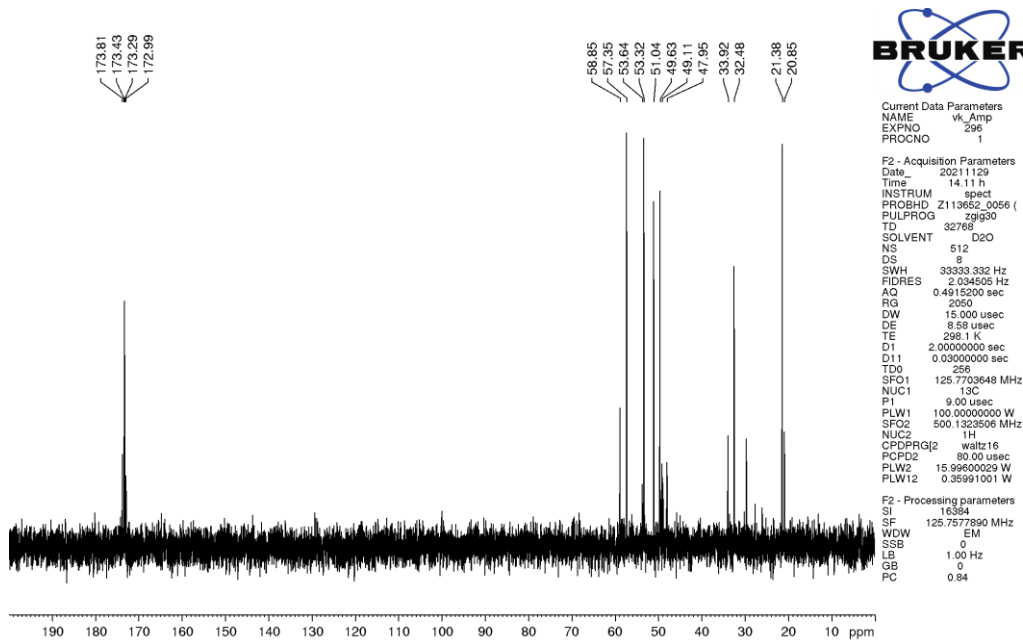

## NMR spectra of compound 9 at different pH

Aliquotes of 550  $\mu\text{l}$  of 150 mM buffers: MES-HCl (pH 6),  $\text{KH}_2\text{PO}_4$ -KOH (pH 7), Tris-HCl (pH 8), and  $\text{H}_3\text{BO}_3$ -KOH (pH 9) – were taken to glass vials and dried over weekend followed by dissolving in 450  $\mu\text{l}$  deuterium oxide each. Compound 9 was freshly prepared from compound 7 (25 mg) by 1-hour treatment with acidic methanol. After removing the volatiles, it was dissolved in 500  $\mu\text{l}$  of deuterium oxide; 100  $\mu\text{l}$  of resulting solution was added to the buffers, and these samples were used for measurements (final sample volume 550  $\mu\text{l}$ ). NMR spectra were recorded using fresh samples, between the measurements the samples were stored at 277 K fridge. Full  $^1\text{H}$  NMR spectra are shown below (residual methanol resonance was used for calibration):

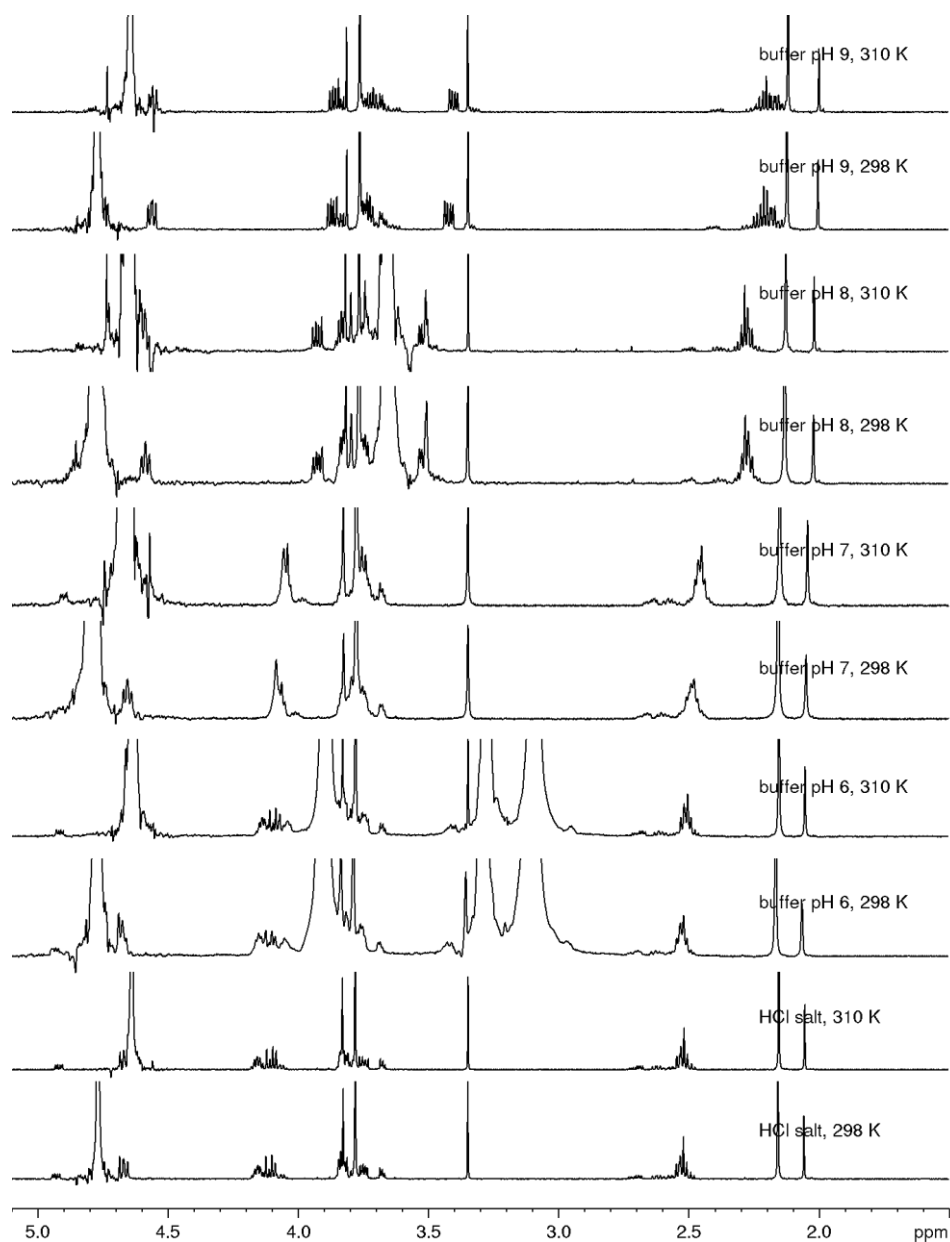

Fragments of  $^1\text{H}$  NMR spectra containing  $\alpha$ -CH resonances are shown below:

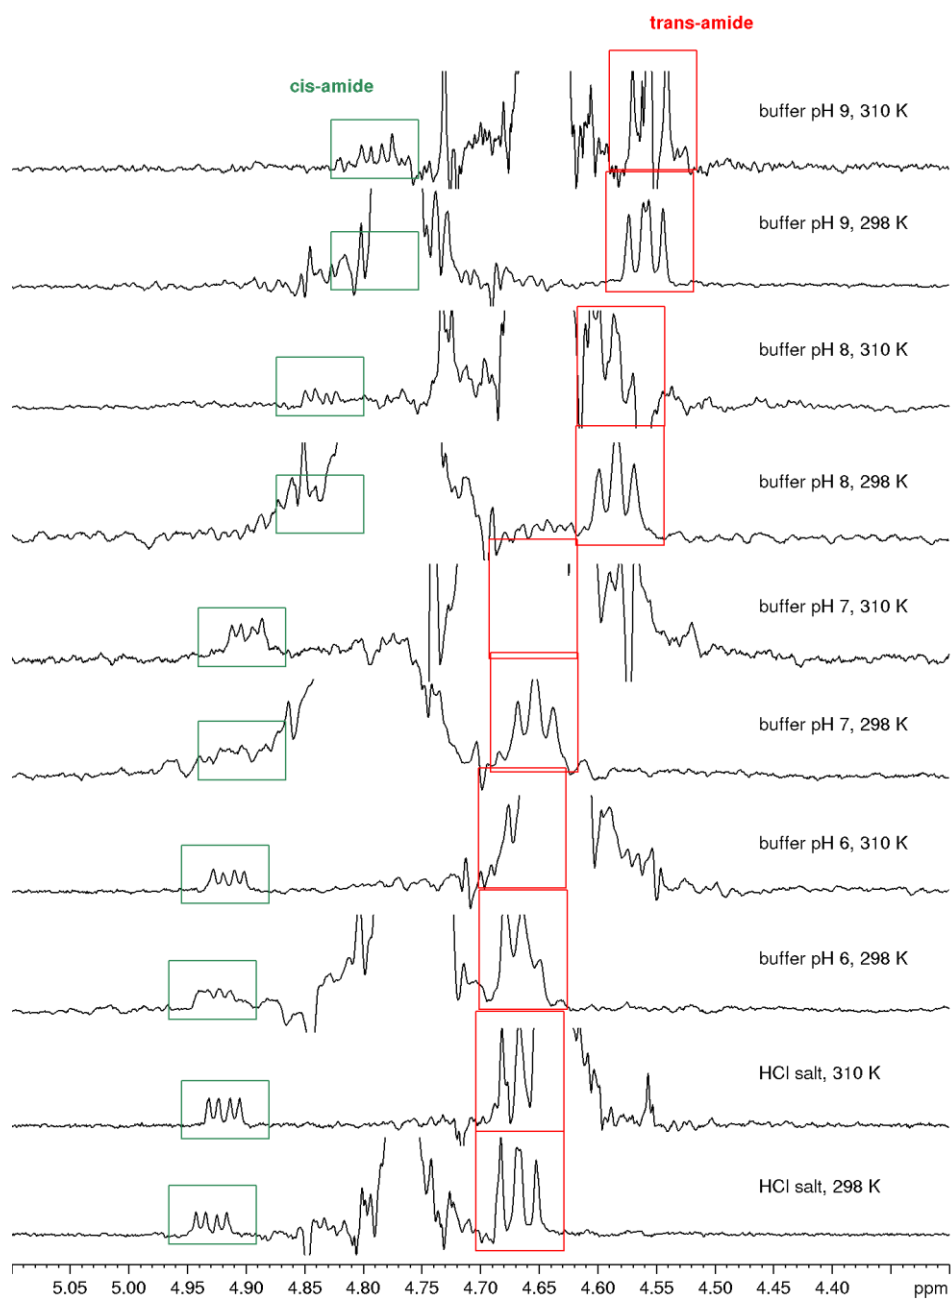

## NMR spectra of Fmoc-derivatives

Fmoc-(Boc)Amp-OCH<sub>2</sub>CHF<sub>2</sub>:

<sup>1</sup>H NMR (500 MHz, DMSO-d<sub>6</sub>), two rotamers 1.2:1 ratio: 7.90 (t, *J* = 7.5 Hz, 2H, Fmoc), 7.64 and 7.61 (two m, 2H, Fmoc), 7.43 (m, 2H, Fmoc), 7.34 (m, 2H, Fmoc), 7.31 and 7.28 (two d, *J* = 6.6 Hz, 1H, NHBoc), 6.26 (major, tt, *J* = 54.0, 3.0 Hz) and 6.23 (minor, tt, *J* = 54.2, 3.1 Hz, 1H in total, CHF<sub>2</sub>), 4.48 (m, 1H, α-CH), 4.45-4.23 (m, 1H, OCH<sub>2</sub>), 4.35-4.20 (m, 2H, CH<sub>2</sub>O in Fmoc), 4.29 and 4.17 (two t, *J* = 6.5 Hz, CH in Fmoc), 4.11 and 4.05 (two m, 1H, γ-CH), 3.64 and 3.56 (two dd, *J* = 10.7, 6.4 Hz, 1H, δ-CH), 3.34 and 3.26 (two dd, *J* = 10.7, 5.3 Hz, 1H, δ-CH), 2.20 and 2.11 (two m, 2H, β-CH<sub>2</sub>), 1.41 and 1.39 (two s, 9H, 3×CH<sub>3</sub> in Boc).

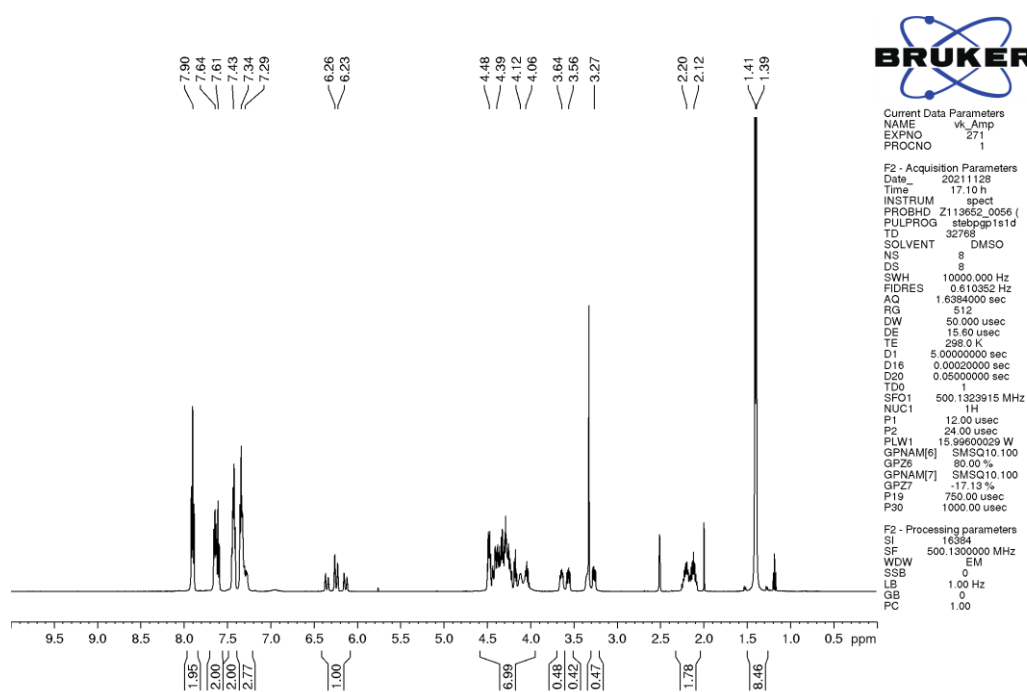

$^{19}\text{F}$  NMR (471 MHz, DMSO- $d_6$ ), two rotamers:  $-126.2$  (dt,  $J = 54, 16$  Hz) and  $-126.3$  (dt,  $J = 54, 16$  Hz).

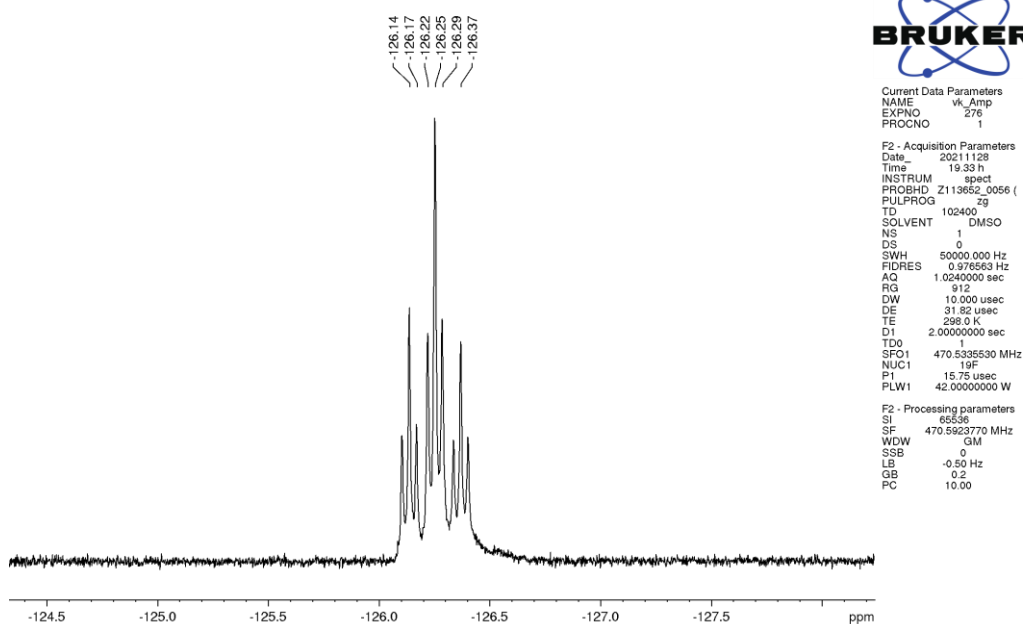

$^{19}\text{F}$  NMR (471 MHz, DMSO- $d_6$ ), two rotamers 1.2:1 ratio:  $-126.20$  (s, major) and  $-126.31$  (s, minor).

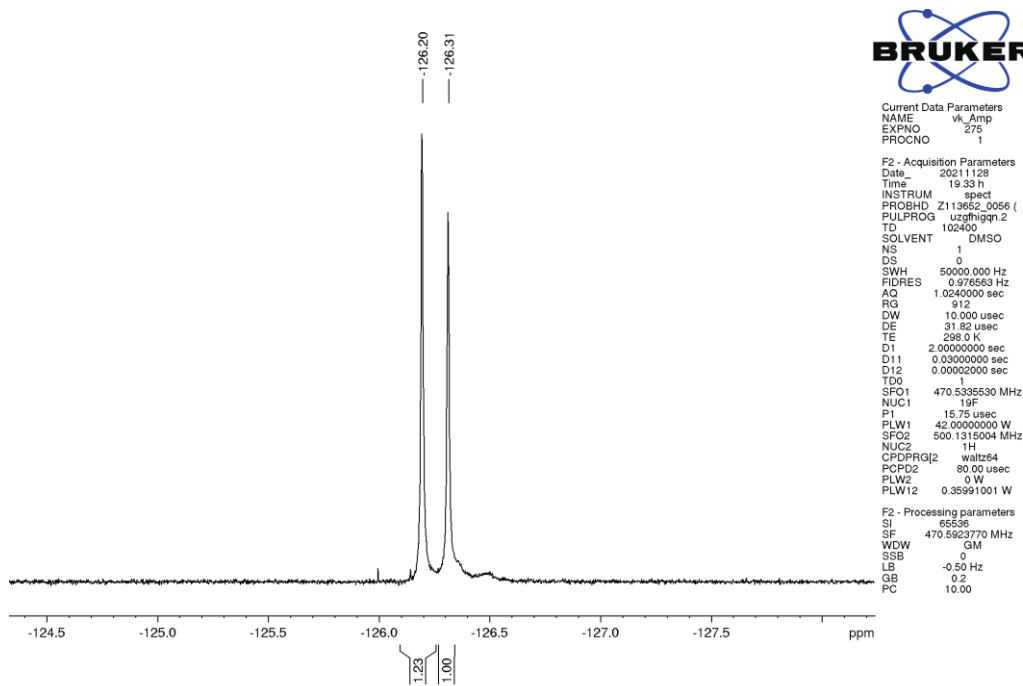

$^{13}\text{C}\{^1\text{H}\}$  NMR (126 MHz, DMSO- $d_6$ ), only major rotamer: 171.8 and 171.7 (two s, ester CO), 155.6 (broad s, CO in Boc), 154.4 and 154.0 (two s, CO in Fmoc), 144.3, 144.2, 144.1 and 144.0 (four s, two C from Fmoc), 141.2 (broad s, C in Fmoc), 128.2 and 128.1 (two s, CH in Fmoc), 127.6 (broad s, CH in Fmoc), 125.5 and 125.3 (two s, CH in Fmoc), 120.64 and 120.58 (two s, CH in Fmoc), 113.8 and 113.7 (two t,  $J = 239$  Hz,  $\text{CHF}_2$ ), 78.7 (s,  $\text{CMe}_3$ ), 67.3 (s,  $\text{CH}_2\text{O}$  in Fmoc), 62.74 and 62.68 (two t,  $J = 27$  Hz,  $\text{OCH}_2$ ), 58.0 and 57.5 (two s,  $\alpha\text{-CH}$ ), 52.3 and 51.8 (two broad s,  $\delta\text{-CH}_2$ ), 49.6 and 48.6 (two broad s,  $\gamma\text{-CH}$ ), 47.01 and 46.95 (two s, CH in Fmoc), 36.1 and 35.0 (two s,  $\beta\text{-CH}_2$ ), 28.6 (s,  $3\times\text{CH}_3$  in Boc).

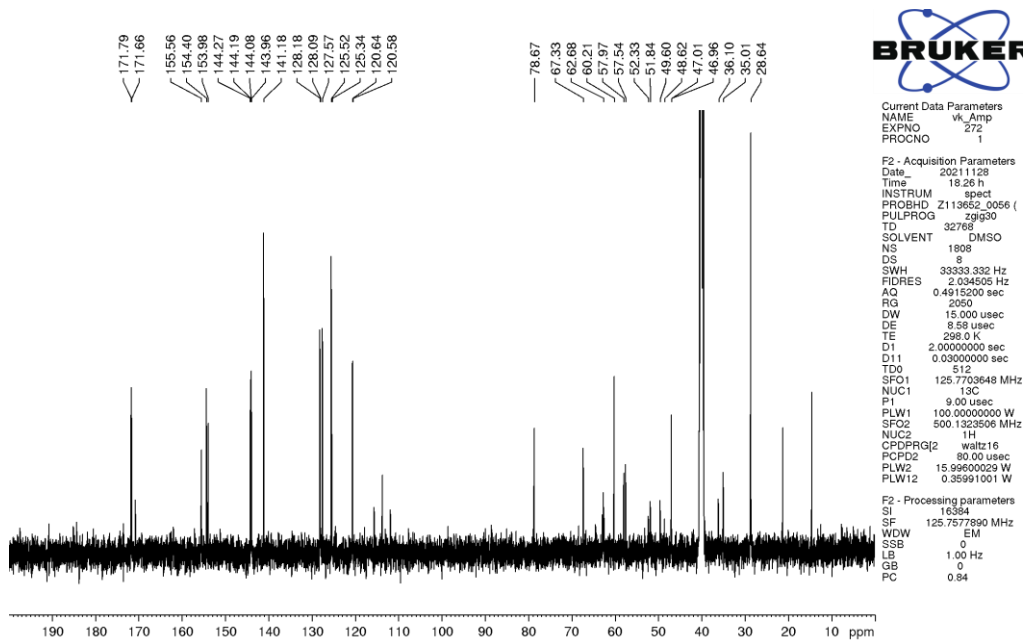

Fmoc-(Boc)Lys-OCH<sub>2</sub>CHF<sub>2</sub>:

<sup>1</sup>H NMR (500 MHz, DMSO-d<sub>6</sub>), only major rotamer: 7.90 (d, *J* = 7.8 Hz, 2H, Fmoc), 7.85 (d, *J* = 7.5, 1H, NHFmoc), 7.72 (dd, *J* = 7.3, 3.8 Hz, 2H, Fmoc), 7.43 (t, *J* = 7.5 Hz, 2H, Fmoc), 7.34 (t, *J* = 7.5 Hz, 2H, Fmoc), 6.77 (t, *J* = 5.5 Hz, 1H, NHBoc), 6.24 (tt, *J* = 54.2, 3.1 Hz, 1H, CHF<sub>2</sub>), 4.44-4.29 (m, 2H, OCH<sub>2</sub>), 4.31 (m, 2H, CH<sub>2</sub>O in Fmoc), 4.24 (t, *J* = 6.8 Hz, 1H, CH in Fmoc), 4.06 (m, 1H, α-CH), 2.90 (m, 2H, CH<sub>2</sub>N), 1.68 (CH<sub>2</sub>), 1.37 (s, 9H, 3×CH<sub>3</sub>), 1.33 (m, 4H, 2×CH<sub>2</sub>).

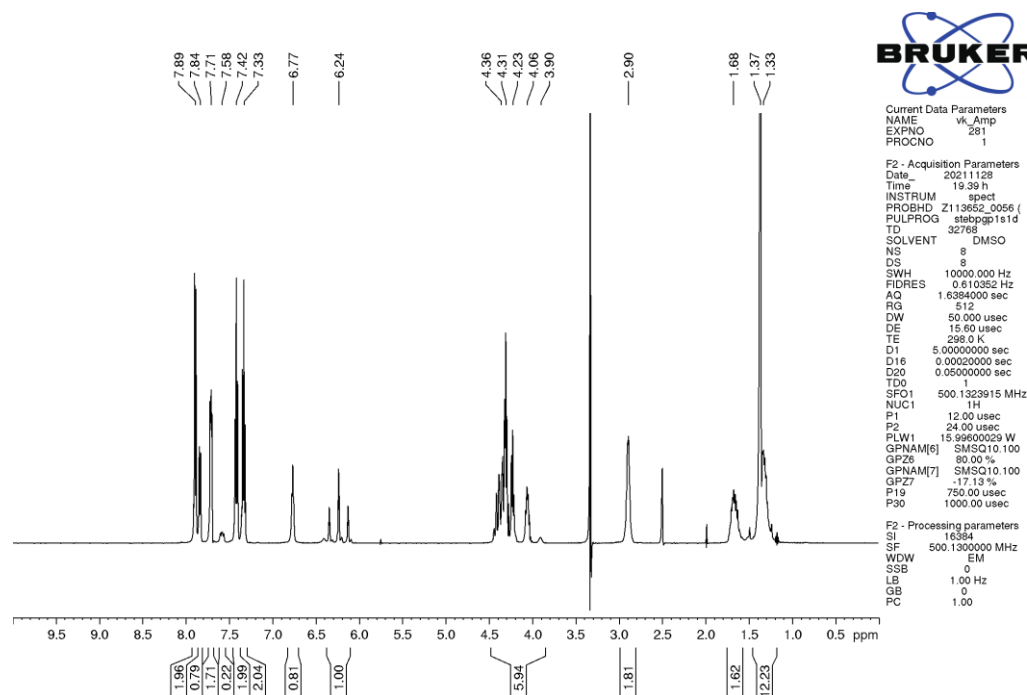



$^{19}\text{F}$  NMR (471 MHz, DMSO- $d_6$ ), only major rotamer:  $-126.0$  (dt,  $J = 54, 16$  Hz).

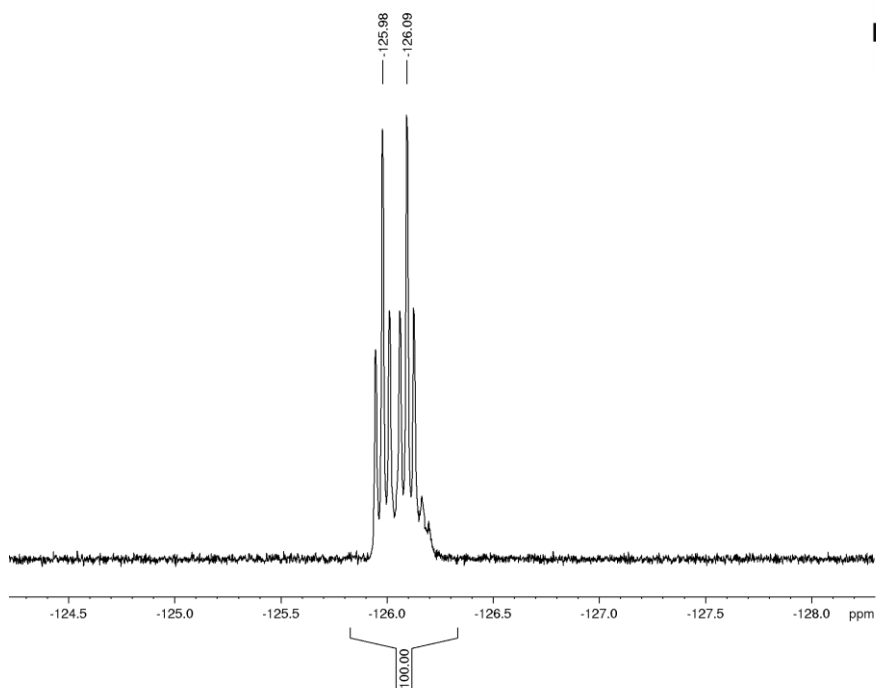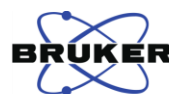

```

Current Data Parameters
NAME      vk_Amp
EXPNO    283
PROCNO   1

F2 - Acquisition Parameters
Date_    20211128
Time     19.40 h
INSTRUM  spect
PROBHD   Z113652_0056 (
PULPROG  zg
TD        102400
SOLVENT  DMSO
NS        1
DS        0
SWH       50000.000 Hz
FIDRES   0.976563 Hz
AQ        1.0240000 sec
RG        912
DW        10.000 usec
DE        31.82 usec
TE        298.0 K
D1        2.00000000 sec
TD0       1
SFO1     470.533530 MHz
NUC1     19F
P1        15.75 usec
PLW1     42.00000000 W

F2 - Processing parameters
SI        65536
SF        470.523770 MHz
WDW       GM
SSB       0
LB        -0.50 Hz
GB        0.2
PC        10.00
    
```

$^{19}\text{F}\{^1\text{H}\}$  NMR (471 MHz, DMSO- $d_6$ ), two rotamers 4:1 ratio:  $-126.04$  (s, major),  $-126.11$  (broad s, minor).

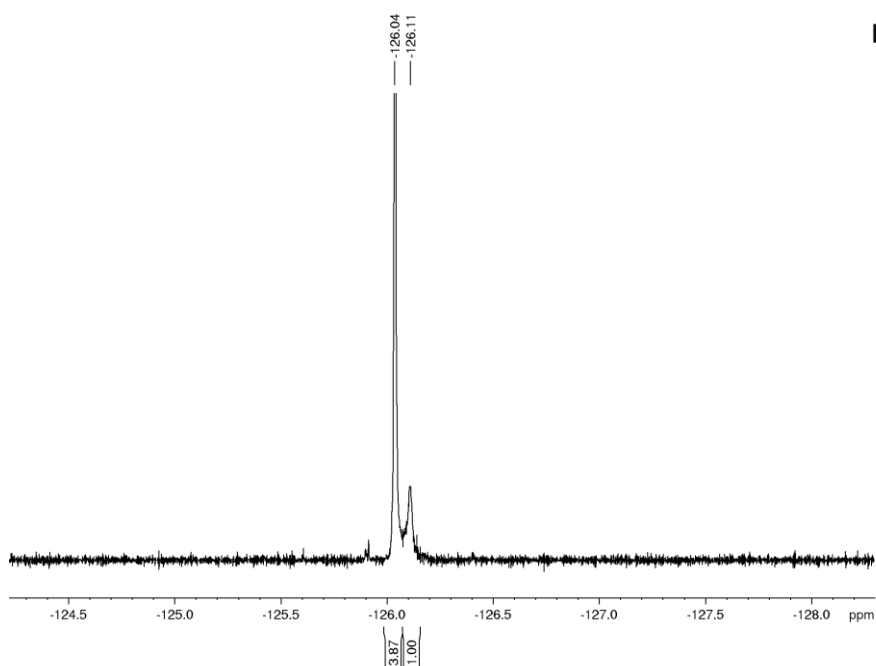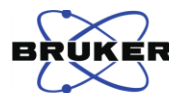

```

Current Data Parameters
NAME      vk_Amp
EXPNO    282
PROCNO   1

F2 - Acquisition Parameters
Date_    20211128
Time     19.39 h
INSTRUM  spect
PROBHD   Z113652_0056 (
PULPROG  uzqfzgq2
TD        102400
SOLVENT  DMSO
NS        1
DS        0
SWH       50000.000 Hz
FIDRES   0.976563 Hz
AQ        1.0240000 sec
RG        912
DW        10.000 usec
DE        31.82 usec
TE        298.0 K
D1        2.00000000 sec
D11       0.03000000 sec
D12       0.00020000 sec
TD0       1
SFO1     470.533530 MHz
NUC1     19F
P1        15.75 usec
PLW1     42.00000000 W
SFO2     500.1315004 MHz
NUC2     1H
CPDPRG2  waltz16
PCPD2    80.00 usec
PLW2     0 W
PLW12    0.35991001 W

F2 - Processing parameters
SI        65536
SF        470.523770 MHz
WDW       EM
SSB       0
LB        -0.50 Hz
GB        0
PC        10.00
    
```

$^{13}\text{C}\{^1\text{H}\}$  NMR (126 MHz, DMSO- $d_6$ ), only major rotamer: 172.3 (s, ester CO), 156.6 (s, carbamate CO), 156.0 (s, carbamate CO), 144.3 (s, Fmoc C), 144.2 (s, Fmoc C), 141.2 (s, Fmoc C), 128.1 (s, Fmoc CH), 127.5 (s, Fmoc CH), 125.7 (s, Fmoc CH), 120.6 (s, Fmoc CH), 113.8 (t,  $J = 238$  Hz,  $\text{CHF}_2$ ), 77.8 (s, Boc C), 66.2 (s,  $\text{CH}_2\text{O}$  in Fmoc), 62.5 (t,  $J = 26$  Hz,  $\text{OCH}_2$ ), 54.3 (s,  $\alpha$ -CH), 47.1 (s, CH in Fmoc), 40.3 (s,  $\text{NCH}_2$ ), 30.7 (s,  $\text{CH}_2$ ), 29.5 (s,  $\text{CH}_2$ ), 28.7 (s,  $\text{CH}_3$  in Boc), 23.2 (s,  $\text{CH}_2$ ).

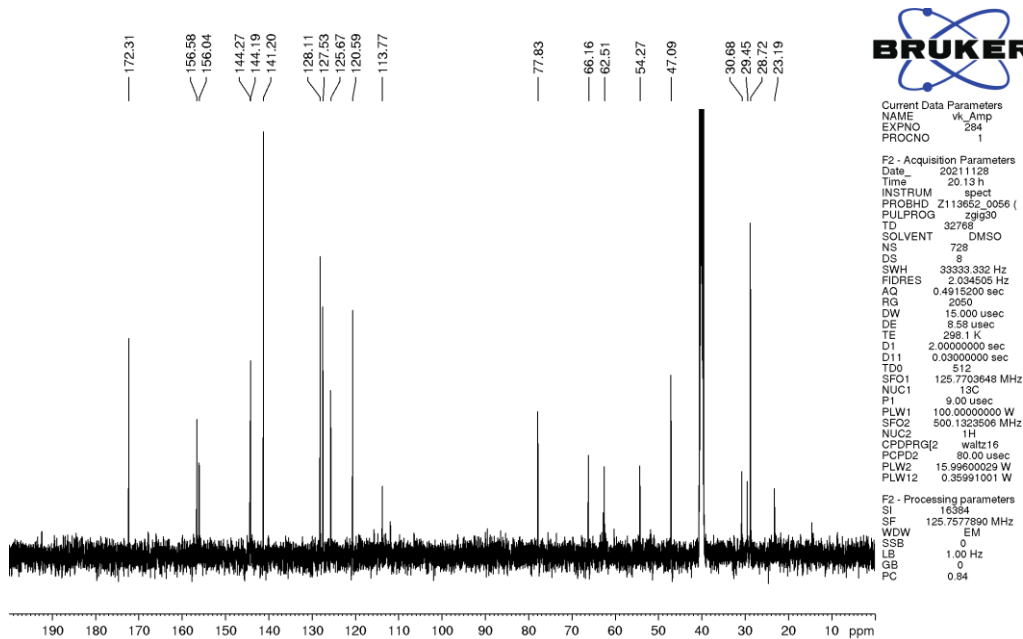

## Diffusion spectrum for peptide 10

Diffusion properties of peptide **10** were examined in  $^1\text{H}$  DOSY experiment recorded in deuterium oxide solution at 298 K. The experiment was conducted using diffusion time 50 ms and gradient pulse 3 ms. The diffusion ordering demonstrates presence of homogenous species with diffusion coefficient  $\log D$  at  $-9.76 \log \text{m}^2 \text{s}^{-1}$ .

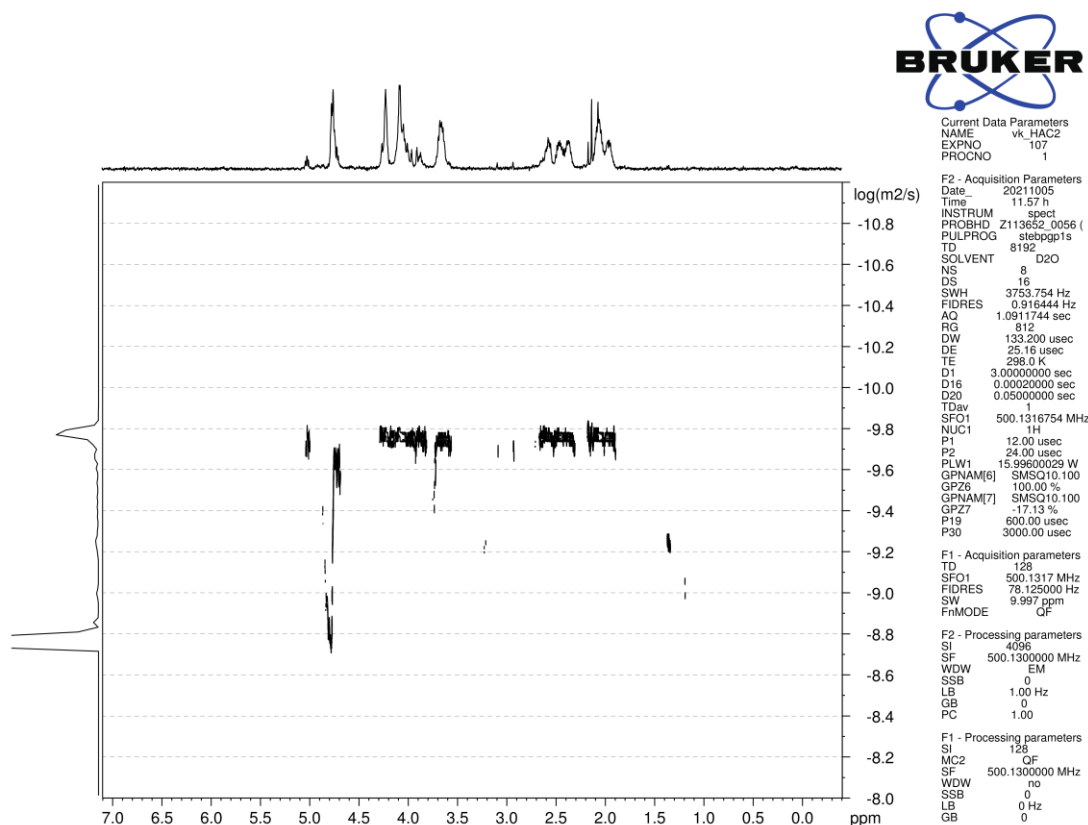

Theoretical value for the peptide was calculated from  $MW = 1664$  (excluding trifluoroacetate counterions) using eq. S1<sup>S4</sup> as  $-9.60 \log \text{m}^2 \text{s}^{-1}$ . Higher experimental value indicates deviation from spherical shape, which is common for peptides that lack a persistent structure.

$$\log D = -8.524 - \frac{1}{3} \log MW \quad (\text{eq. S1})$$

For reference, the diffusion of residual deuterium oxide was expected at  $-8.73$  and found at  $-8.75 \log \text{m}^2 \text{s}^{-1}$ .

Diffusion experiment with peptide Ac-(Pro-Hyp-Gly)<sub>6</sub>-OH was conducted with the same experimental parameters delivering the diffusion values  $-9.76 \log \text{m}^2 \text{s}^{-1}$  for the peptide resonances and  $-8.75 \log \text{m}^2 \text{s}^{-1}$  for residual water:

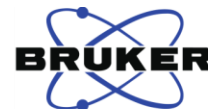

Current Data Parameters  
 NAME vk\_HAC2  
 EXPNO 84  
 PROCNO 1

F2 - Acquisition Parameters  
 Date\_ 20210924  
 Time 13.37 h  
 INSTRUM spect  
 PROBHD Z113652\_0056 ( )  
 PULPROG stebbpp1s  
 TD 8192  
 SOLVENT D2O  
 NS 8  
 DS 16  
 SWH 3753.754 Hz  
 FIDRES 0.916444 Hz  
 AQ 1.0911744 sec  
 RG 812  
 DW 133.200 usec  
 DE 25.16 usec  
 TE 296.0 K  
 D1 3.00000000 sec  
 D16 0.00020000 sec  
 D20 0.05000000 sec  
 TDav 1  
 SFO1 500.1316754 MHz  
 NUC1 1H  
 P1 12.00 usec  
 P2 24.00 usec  
 PLW1 15.99600029 W  
 GPNAM[6] SMSQ10.100  
 GPZ6 100.00 %  
 GPNAM[7] SMSQ10.100  
 GPZ7 -17.13 %  
 P19 600.00 usec  
 P30 3000.00 usec

F1 - Acquisition parameters  
 TD 128  
 SFO1 500.1317 MHz  
 FIDRES 79.125000 Hz  
 SW 9.997 ppm  
 F1MODE QF

F2 - Processing parameters  
 SI 4096  
 SF 500.1300000 MHz  
 WDW EM  
 SSB 0  
 LB 1.00 Hz  
 GB 0  
 PC 1.00

F1 - Processing parameters  
 SI 128  
 MC2 QF  
 SF 500.1300000 MHz  
 WDW no  
 SSB 0  
 LB 0 Hz  
 GB 0

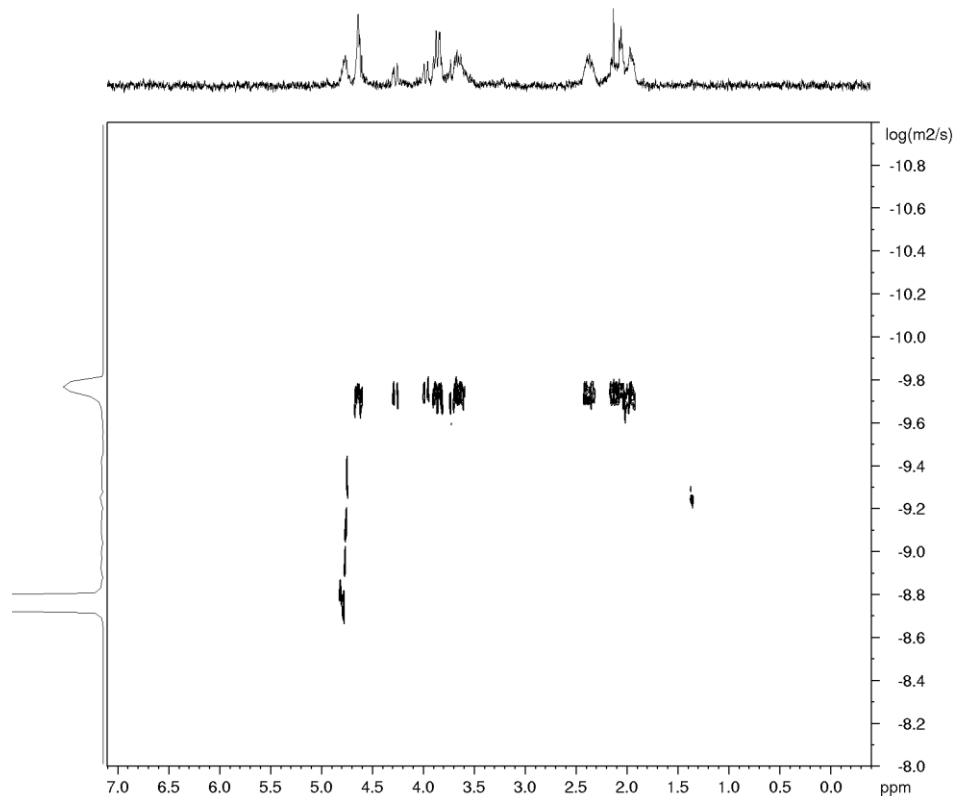

## References

- <sup>S1</sup> V. Kubyshkin, *Org. Biomol. Chem.* **2021**, 19, 7031-7040. Doi: 10.1039/d1ob01213d
- <sup>S2</sup> V. Kubyshkin, *Beilstein J. Org. Chem.* **2020**, 16, 1837-1852. Doi: 10.3762/bjoc.16.151
- <sup>S3</sup> M. Kuemin, Y. A. Nagel, S. Schweizer, F. W. Monnard, C. Ochsenfeld and H. Wennemers, *Angew. Chem. Int. Ed.* **2010**, 49, 6324-6327. Doi: 10.1002/anie.201001851
- <sup>S4</sup> V. Kubyshkin and N. Budisa, *Beilstein J. Org. Chem.* **2017**, 13, 2442-2457. Doi: 10.3762/bjoc.13.241
